# Supplementary material for: Allosteric stabilization of calcium and phosphoinositide dual binding engages several synaptotagmins in fast exocytosis
Source: eLife. 2022 Aug 5;11:e74810. doi: 10.7554/eLife.74810 (PMC9489213; doi:10.7554/eLife.74810)
Supplement: Figure 2—source data 1. [file elife-74810-fig2-data1.xlsx]

## Sheet: Figure 2
Figure 2
Panel A
Calcium (µM)	0.01	0.1	0.2	0.3	0.4	0.5	0.6	0.7	0.8	0.9	1	1.25	1.5	1.75	2	2.5	3	4	5	6	7	8	9	10	20	30	40	50	60	70	80
M_slots = 1
Median release latencies (ms)	NaN	NaN	NaN	NaN	NaN	NaN	NaN	NaN	NaN	NaN	7.38764	5.37271	4.01393	3.25669	2.71155	2.11698	1.77242	1.3696	1.16585	1.04865	0.949223	0.880492	0.829722	0.776341	0.58775	0.519055	0.48511	0.461767	0.442888	0.432618	0.421098
2.5 % quantile release latencies (ms)	NaN	NaN	NaN	NaN	NaN	NaN	NaN	NaN	NaN	NaN	2.8942	2.24151	1.79048	1.63186	1.3963	1.17602	1.03638	0.901321	0.793	0.726686	0.662421	0.652584	0.614454	0.583115	0.484461	0.439884	0.422406	0.408729	0.396583	0.389703	0.381621
97.5 % quantile release latencies (ms)	NaN	NaN	NaN	NaN	NaN	NaN	NaN	NaN	NaN	NaN	27.8604	17.5022	12.1588	10.3779	8.19298	5.73854	4.5401	2.7364	1.99038	1.81966	1.52872	1.49792	1.32156	1.18398	0.793456	0.658681	0.59062	0.561461	0.524601	0.514758	0.489768
Mean peak release rates (SVs/ms)	0.00218816	0.0140097	0.0338076	0.0720989	0.131388	0.20252	0.286933	0.411755	0.507806	0.645463	0.800436	1.24365	1.80934	2.45306	3.09876	4.83963	7.18875	12.606	19.7955	28.5341	37.5971	51.2843	61.2316	78.1302	279.705	552.883	824.304	1156.34	1408.82	1776.68	1991.5
2.5 % quantile peak release rates (SVs/ms)	0.00056096	0.00400944	0.00951439	0.0195935	0.0407476	0.0486803	0.0773259	0.120552	0.142335	0.165881	0.199952	0.336533	0.437862	0.638176	0.812455	1.33603	1.87167	3.75408	5.4922	7.94044	10.1685	16.021	16.3965	22.1438	68.8092	146.082	207.103	319.016	385.948	510.142	499.664
97.5 % quantile peak release rates (SVs/ms)	0.00461488	0.0308399	0.074495	0.170498	0.266365	0.452352	0.631447	0.916503	1.12592	1.44404	1.78786	2.85476	4.02407	5.23854	6.7949	10.4664	15.552	27.65	41.9023	65.5894	79.1872	108.976	132.811	177.131	601.245	1196.75	1853.19	2569.51	3028.99	3690.86	4307.3
M_slots = 2
Median release latencies (ms)	NaN	NaN	NaN	NaN	NaN	NaN	NaN	NaN	NaN	NaN	17.6761	9.6594	6.48998	4.71534	3.72974	2.60954	2.03931	1.45815	1.15358	0.973948	0.85803	0.79114	0.734861	0.682699	0.517324	0.471843	0.45253	0.444225	0.437954	0.433945	0.432722
2.5 % quantile release latencies (ms)	NaN	NaN	NaN	NaN	NaN	NaN	NaN	NaN	NaN	NaN	6.91855	4.41671	3.25528	2.51567	2.15664	1.58694	1.36936	1.00476	0.848079	0.737474	0.676298	0.615092	0.585387	0.558747	0.454649	0.426334	0.416353	0.409761	0.402769	0.401242	0.399292
97.5 % quantile release latencies (ms)	NaN	NaN	NaN	NaN	NaN	NaN	NaN	NaN	NaN	NaN	67.0018	30.3581	16.7546	11.3128	8.76011	5.01627	3.852	2.32367	1.82521	1.46423	1.25113	1.05571	1.01596	0.926204	0.626092	0.548308	0.530698	0.526864	0.512856	0.50827	0.508573
Mean peak release rates (SVs/ms)	0.00167256	0.00233442	0.00475454	0.0100031	0.0199524	0.0356374	0.0626476	0.105614	0.163373	0.245807	0.355229	0.78866	1.50527	2.65473	4.32643	9.64391	18.0487	45.8444	89.029	138.99	209.403	273.964	344.115	401.338	954.461	1244.95	1357.03	1414.91	1451.81	1444.68	1538.51
2.5 % quantile peak release rates (SVs/ms)	0.000459218	0.000628483	0.00107915	0.0024446	0.00523464	0.00934237	0.0174786	0.0316073	0.0467405	0.0694311	0.0966045	0.208974	0.422878	0.746633	1.28095	2.49997	4.5848	12.8671	26.0789	40.0645	62.8287	76.9385	94.0845	106.625	278.643	335.918	377.28	349.184	398.08	338.931	399.116
97.5 % quantile peak release rates (SVs/ms)	0.00363255	0.00502638	0.0102819	0.0221028	0.0431393	0.0753548	0.138341	0.220966	0.368011	0.535125	0.765778	1.797	3.09842	6.1572	9.60661	21.7332	40.6053	95.533	191.612	305.087	473.373	573.016	782.911	860.722	2131.62	2707.63	2955.11	3147.98	3061.52	3211.16	3396.3
M_slots = 3
Median release latencies (ms)	NaN	NaN	NaN	NaN	NaN	NaN	NaN	NaN	NaN	NaN	27.5784	13.8558	8.53169	6.06234	4.6538	3.14995	2.38296	1.62579	1.24633	1.04532	0.902603	0.810118	0.751824	0.701304	0.505333	0.45584	0.434711	0.423142	0.416152	0.411987	0.408136
2.5 % quantile release latencies (ms)	NaN	NaN	NaN	NaN	NaN	NaN	NaN	NaN	NaN	NaN	11.462	6.66891	4.63665	3.52966	2.82825	2.01966	1.6757	1.17146	0.945183	0.80538	0.740952	0.669155	0.630081	0.596099	0.460458	0.42504	0.411926	0.403769	0.399442	0.395609	0.39376
97.5 % quantile release latencies (ms)	NaN	NaN	NaN	NaN	NaN	NaN	NaN	NaN	NaN	NaN	93.1013	40.9852	21.9086	12.9075	8.3132	5.15503	3.68646	2.45102	1.81718	1.42411	1.23106	1.05999	0.976861	0.898997	0.594694	0.519873	0.486691	0.46639	0.459029	0.457798	0.456361
Mean peak release rates (SVs/ms)	0.00168792	0.00193259	0.00296678	0.00511475	0.00959438	0.0179307	0.0324925	0.0570372	0.0923605	0.151259	0.237231	0.617781	1.4229	3.03513	5.46374	13.9651	28.7019	82.6116	169.548	265.938	376.49	498.689	607.423	720.137	1297.72	1484.44	1582.28	1571.69	1650.79	1617.82	1630.37
2.5 % quantile peak release rates (SVs/ms)	0.000512417	0.000583037	0.00085053	0.00139372	0.00232682	0.00474261	0.00857066	0.0151561	0.0282091	0.0432841	0.062587	0.160223	0.338664	0.930482	1.46101	3.42405	7.51534	21.2844	49.3452	64.4884	99.1026	125.42	180.013	206.691	318.766	449.345	386.941	438.405	491.22	409.998	435.988
97.5 % quantile peak release rates (SVs/ms)	0.00364771	0.00419964	0.00646396	0.0107319	0.0215378	0.0369461	0.0680161	0.125623	0.205926	0.343036	0.520265	1.35292	3.06134	6.60818	11.6197	31.414	62.4186	182.04	372.517	588.312	848.384	1095.86	1265.95	1637.65	2770.94	3124.54	3624.45	3552.63	3748.97	3600.81	3613.9
M_slots = 6
Median release latencies (ms)	NaN	NaN	NaN	NaN	NaN	NaN	NaN	NaN	NaN	NaN	7.38764	5.37271	4.01393	3.25669	2.71155	2.11698	1.77242	1.3696	1.16585	1.04865	0.949223	0.880492	0.829722	0.776341	0.58775	0.519055	0.48511	0.461767	0.442888	0.432618	0.421098
2.5 % quantile release latencies (ms)	NaN	NaN	NaN	NaN	NaN	NaN	NaN	NaN	NaN	NaN	2.8942	2.24151	1.79048	1.63186	1.3963	1.17602	1.03638	0.901321	0.793	0.726686	0.662421	0.652584	0.614454	0.583115	0.484461	0.439884	0.422406	0.408729	0.396583	0.389703	0.381621
97.5 % quantile release latencies (ms)	NaN	NaN	NaN	NaN	NaN	NaN	NaN	NaN	NaN	NaN	27.8604	17.5022	12.1588	10.3779	8.19298	5.73854	4.5401	2.7364	1.99038	1.81966	1.52872	1.49792	1.32156	1.18398	0.793456	0.658681	0.59062	0.561461	0.524601	0.514758	0.489768
Mean peak release rates (SVs/ms)	0.00172628	0.00187054	0.00267396	0.00471708	0.00824902	0.0152211	0.0268541	0.0467738	0.075184	0.123538	0.194656	0.543644	1.2638	2.54841	4.85464	13.0938	29.0699	84.5017	174.241	278.195	386.52	505.136	644.376	755.568	1405.87	1705.88	1803.83	1882.14	1879.99	1872.34	1897.96
2.5 % quantile peak release rates (SVs/ms)	0.000489831	0.000478104	0.000684042	0.0012996	0.00237463	0.00391835	0.00687155	0.0121819	0.0215336	0.0337724	0.052501	0.150553	0.344636	0.649474	1.3721	3.59363	7.85634	20.8903	45.7355	69.1108	100.676	124.236	167.71	228.341	390.129	441.802	516.984	548.778	506.626	502.432	491.864
97.5 % quantile peak release rates (SVs/ms)	0.00370158	0.00401862	0.00605454	0.0100246	0.0183817	0.0339478	0.0598711	0.0986463	0.169972	0.27638	0.414604	1.17806	2.72744	5.59241	11.129	29.1454	65.0298	179.877	379.727	636.335	840.096	1134.24	1412.09	1619.66	3091.38	3933.01	4133.64	3958.48	4047.67	4220.85	4069.79
Panel B
M_slots	1	2	3	4	5	6
Cost value	581.913	-92.501	-139.448	-130.271	-127.737	-126.486
Panel C
M_slots	1	2	3	4	5	6
Max slope of peak release rates	2.34304	3.68062	4.91439	4.7915	4.72994	4.82632
Panel D
[Ca2+] = 2 µM
Number of cross before fusion	0-1	2	3
Fraction of fusions (N=10000)	0.0117	0.2379	0.7504
[Ca2+] = 10 µM
Number of cross before fusion	0-1	2	3
Fraction of fusions (N=10000)	0	0.0153	0.9847
[Ca2+] = 50 µM
Number of cross before fusion	0-1	2	3
Fraction of fusions (N=10000)	0	0.0028	0.9972
Panel E
[Ca2+] = 2 µM
Number of cross before fusion	0-1	2	3	4	5-6
Fraction of fusions (N=10000)	0.0131	0.2519	0.7202	0.0148	0
[Ca2+] = 10 µM
Number of cross before fusion	0-1	2	3	4	5-6
Fraction of fusions (N=10000)	0	0.0189	0.7644	0.2167	0
[Ca2+] = 50 µM
Number of cross before fusion	0-1	2	3	4	5-6
Fraction of fusions (N=10000)	0	0.0085	0.6403	0.3502	0.001
Panel F
M_slots	1	2	3	4	5	6
Best fit log(f)=E_syt [k_B*T]'	15.2645	7.16868	4.85367	5.02431	5.07275	5.09678
Panel H
f value	60.4493	72.9498	88.0352	106.24	128.21	154.723	186.718	225.33	271.927	328.16	396.021	477.915	576.744	696.01	839.94	1013.63	1223.25	1476.2	1781.47	2149.87	2594.44	3130.96	3778.41	4559.76	5502.69	6640.6	8013.83	9671.03	11670.9	14084.4	16996.9	20511.8	24753.5	29872.3	36049.7	43504.5	52500.9	63357.7	76459.6	92270.9	111352	134379	162167	195702	236172	285010	343948	415074	500909
cost value	-14.2546	-78.7499	-117.083	-134.886	-139.448	-136.245	-128.45	-118.586	-109.305	-102.739	-99.7277	-99.7261	-101.552	-104.116	-106.359	-107.13	-105.475	-100.668	-92.2186	-80.068	-64.684	-46.9649	-28.0065	-8.84686	9.71812	27.2616	43.7119	59.2442	74.0962	88.4134	102.097	114.519	124.849	132.199	137.742	142.835	147.892	153.007	158.27	163.638	169.145	174.602	180.101	185.47	190.565	192.213	214.065	237.898	259.206
[truncated: 1 more columns]

## Sheet: Figure 2 - figure supplement 2
Figure 2 - figure supplement 2
Panel B
Ramp calcium
[Ca2+] = 0.5 µM
Number of cross before fusion	0-1	2	3	4	5-6
Fraction of fusions (N=10000)	0.4478	0.4627	0.0895	0	0
[Ca2+] = 1 µM
Number of cross before fusion	0-1	2	3	4	5-6
Fraction of fusions (N=10000)	0.1059	0.4965	0.3976	0	0
[Ca2+] = 50 µM
Number of cross before fusion	0-1	2	3	4	5-6
Fraction of fusions (N=10000)	0	0.0033	0.9967	0	0
[Ca2+] = 100 µM
Number of cross before fusion	0-1	2	3	4	5-6
Fraction of fusions (N=10000)	0	0.0054	0.9946	0	0
[Ca2+] = 200 µM
Number of cross before fusion	0-1	2	3	4	5-6
Fraction of fusions (N=10000)	0	0.0025	0.9975	0	0
[Ca2+] = 400 µM
Number of cross before fusion	0-1	2	3	4	5-6
Fraction of fusions (N=10000)	0	0.004	0.996	0	0
Linear calcium
Rise time 100 s
Number of cross before fusion	0-1	2	3	4	5-6
Fraction of fusions (N=10000)	0.0171	0.2368	0.7461	0	0
Rise time 10 s
Number of cross before fusion	0-1	2	3	4	5-6
Fraction of fusions (N=10000)	0.0058	0.1172	0.877	0	0
Rise time 1 s
Number of cross before fusion	0-1	2	3	4	5-6
Fraction of fusions (N=10000)	0.0007	0.0534	0.9459	0	0
Rise time 1e-1 s
Number of cross before fusion	0-1	2	3	4	5-6
Fraction of fusions (N=10000)	0	0.018	0.982	0	0
Rise time 1e-2 s
Number of cross before fusion	0-1	2	3	4	5-6
Fraction of fusions (N=10000)	0	0.0058	0.9942	0	0
Rise time 1e-3 s
Number of cross before fusion	0-1	2	3	4	5-6
Fraction of fusions (N=10000)	0	0.0033	0.9967	0	0
Rise time 1e-4 s
Number of cross before fusion	0-1	2	3	4	5-6
Fraction of fusions (N=10000)	0	0.005	0.995	0	0
Rise time 1e-5 s
Number of cross before fusion	0-1	2	3	4	5-6
Fraction of fusions (N=10000)	0	0.0027	0.9973	0	0
Rise time 1e-6 s
Number of cross before fusion	0-1	2	3	4	5-6
Fraction of fusions (N=10000)	0	0.0043	0.9957	0	0
Panel C
Ramp calcium
[Ca2+] (µM)	0.5	1	50	100	200	400
Mean no. of crosslinks	1.551	2.2866	2.9967	2.9946	2.9975	2.996
SD no. of crosslinks	0.779654	0.660836	0.0573536	0.0732897	0.04994	0.0631221
Linear calcium
Rise time (s)	100	10	1	0.1	0.01	0.001	0.0001	1e-05	1e-06
Mean no. of crosslinks	2.7286	2.871	2.9452	2.982	2.9942	2.9967	2.995	2.9973	2.9957
SD no. of crosslinks	0.483286	0.35323	0.230656	0.132958	0.0759403	0.0573536	0.0705372	0.0518939	0.0654365

## Sheet: Figure 2 - figure supplement 3
Figure 2 - figure supplement 3
Panel B
Ramp calcium
[Ca2+] = 0.5 µM
Number of cross before fusion	0-1	2	3	4	5-6
Fraction of fusions (N=10000)	0.465	0.4477	0.0872	0.0001	0
[Ca2+] = 1 µM
Number of cross before fusion	0-1	2	3	4	5-6
Fraction of fusions (N=10000)	0.1083	0.5094	0.3795	0.0028	0
[Ca2+] = 50 µM
Number of cross before fusion	0-1	2	3	4	5-6
Fraction of fusions (N=10000)	0	0.0068	0.6378	0.3547	0.0007
[Ca2+] = 100 µM
Number of cross before fusion	0-1	2	3	4	5-6
Fraction of fusions (N=10000)	0	0.0077	0.6275	0.3639	0.0009
[Ca2+] = 200 µM
Number of cross before fusion	0-1	2	3	4	5-6
Fraction of fusions (N=10000)	0	0.0073	0.6242	0.3674	0.0011
[Ca2+] = 400 µM
Number of cross before fusion	0-1	2	3	4	5-6
Fraction of fusions (N=10000)	0	0.0059	0.629	0.3642	0.0009
Linear calcium
Rise time 100 s
Number of cross before fusion	0-1	2	3	4	5-6
Fraction of fusions (N=10000)	0.0157	0.2288	0.7414	0.0141	0
Rise time 10 s
Number of cross before fusion	0-1	2	3	4	5-6
Fraction of fusions (N=10000)	0.005	0.1304	0.8222	0.0424	0
Rise time 1 s
Number of cross before fusion	0-1	2	3	4	5-6
Fraction of fusions (N=10000)	0.0009	0.0569	0.8455	0.0967	0
Rise time 1e-1 s
Number of cross before fusion	0-1	2	3	4	5-6
Fraction of fusions (N=10000)	0	0.0195	0.7661	0.2142	0.0002
Rise time 1e-2 s
Number of cross before fusion	0-1	2	3	4	5-6
Fraction of fusions (N=10000)	0	0.0092	0.652	0.3381	0.0007
Rise time 1e-3 s
Number of cross before fusion	0-1	2	3	4	5-6
Fraction of fusions (N=10000)	0.0001	0.0069	0.6292	0.3632	0.0006
Rise time 1e-4 s
Number of cross before fusion	0-1	2	3	4	5-6
Fraction of fusions (N=10000)	0	0.0063	0.6348	0.3583	0.0006
Rise time 1e-5 s
Number of cross before fusion	0-1	2	3	4	5-6
Fraction of fusions (N=10000)	0	0.006	0.6333	0.3592	0.0015
Rise time 1e-6 s
Number of cross before fusion	0-1	2	3	4	5-6
Fraction of fusions (N=10000)	0	0.0068	0.6323	0.3602	0.0007
Panel C
Ramp calcium
[Ca2+] (µM)	0.5	1	50	100	200	400
Mean no. of crosslinks	1.5112	2.2691	3.3493	3.358	3.3623	3.3601
SD no. of crosslinks	0.804574	0.670619	0.492254	0.497052	0.497859	0.494017
Linear calcium
Rise time (s)	100	10	1	0.1	0.01	0.001	0.0001	1e-05	1e-06
Mean no. of crosslinks	2.7535	2.9016	3.038	3.1951	3.3303	3.3573	3.3532	3.3562	3.3548
SD no. of crosslinks	0.496953	0.430274	0.394679	0.443233	0.490944	0.495239	0.492213	0.494314	0.493904

## Sheet: Figure 2 - Figure supplement 4
Figure 2 - figure supplement 4
Panel A
Calcium concentrations (µM)	0.01	0.1	0.2	0.3	0.4	0.5	0.6	0.7	0.8	0.9	1	1.25	1.5	1.75	2	2.5	3	4	5	6	7	8	9	10	20	30	40	50	60	70	80
Median release latencies (ms)	NaN	NaN	NaN	NaN	NaN	NaN	NaN	NaN	NaN	NaN	75.1195	28.2476	13.8647	8.76935	6.26582	3.91238	2.84535	1.8281	1.35797	1.0904	0.932707	0.823292	0.74868	0.688381	0.486334	0.438116	0.419192	0.408764	0.403236	0.398963	0.396672
2.5 % quantile release latencies (ms)	NaN	NaN	NaN	NaN	NaN	NaN	NaN	NaN	NaN	NaN	24.0386	12.3937	7.60286	5.28711	4.10156	2.7765	2.0221	1.39462	1.09708	0.898428	0.786598	0.705062	0.651599	0.606215	0.457763	0.424199	0.409004	0.40122	0.396711	0.395358	0.391567
97.5 % quantile release latencies (ms)	NaN	NaN	NaN	NaN	NaN	NaN	NaN	NaN	NaN	NaN	334.381	92.1349	36.6002	19.5761	11.4139	6.35401	4.08631	2.48815	1.75093	1.36444	1.14648	1.00918	0.888457	0.815635	0.530772	0.465748	0.436258	0.423745	0.413696	0.409086	0.405486
Mean peak release rates (SVs/ms)	0.00174037	0.00178091	0.00210291	0.00268245	0.00387548	0.00597364	0.0094709	0.016131	0.0254551	0.0438141	0.0748036	0.242895	0.723817	1.84879	4.04134	14.3436	34.2224	107.283	211.29	339.819	474.757	630.053	780.093	918.843	1955.35	2466.23	2776.14	2931.51	3011.67	3233.86	3136.28
2.5 % quantile peak release rates (SVs/ms)	0.000446309	0.000506244	0.0005873	0.00071313	0.00103057	0.00165528	0.00253164	0.00448658	0.00698006	0.0118706	0.0212023	0.062694	0.211928	0.578026	1.20622	3.93705	9.22405	30.4494	56.2566	97.6988	133.653	162.265	205.173	228.187	534.166	652.344	790.77	756.68	851.991	805.629	896.083
97.5 % quantile peak release rates (SVs/ms)	0.00368052	0.00382784	0.00444564	0.00576657	0.00886154	0.0128096	0.0211588	0.0349317	0.0521352	0.0955988	0.172608	0.514741	1.57914	4.05775	8.41787	32.2764	72.8777	229.486	474.283	781.676	1055.29	1410.74	1723.82	1930.34	4330.05	5476.41	6010.2	6463.82	6606.58	7396.42	7129.65
Panel B
Number of dual bounds	0-1	2	3	4	`5 -6
Fraction of fusion events [Ca]= 0.5 uM	0.6423	0.2532	0.0851	0.0183	0.0011
Fraction of fusion events [Ca]= 1 uM	0.1091	0.2369	0.3156	0.2427	0.0957
Fraction of fusion events [Ca]= 50 uM	0	0	0.0001	0.0137	0.9862
Fraction of fusion events [Ca]= 100 uM	0	0	0.0005	0.0141	0.9854
Fraction of fusion events [Ca]= 200 uM	0	0	0.0001	0.0138	0.9861
Fraction of fusion events [Ca]= 400 uM	0	0	0	0.0135	0.9865

## Sheet: Figure 2 - figure supplement 5
Figure 2 - figure supplement 5
Panel A
Calcium concentrations (µM)	0.01	0.1	0.2	0.3	0.4	0.5	0.6	0.7	0.8	0.9	1	1.25	1.5	1.75	2	2.5	3	4	5	6	7	8	9	10	20	30	40	50	60	70	80
Median release latencies (ms)	NaN	NaN	NaN	NaN	NaN	NaN	NaN	NaN	NaN	NaN	25.6064	11.9241	7.12935	5.19967	3.9386	2.74771	2.16523	1.53175	1.22855	1.04786	0.933734	0.844232	0.784657	0.73241	0.529424	0.467973	0.439489	0.424061	0.414171	0.405493	0.401971
2.5 % quantile release latencies (ms)	NaN	NaN	NaN	NaN	NaN	NaN	NaN	NaN	NaN	NaN	5.83375	3.88826	3.0907	2.41721	2.12997	1.73805	1.4427	1.1478	0.979976	0.876714	0.807346	0.736834	0.706392	0.659562	0.510057	0.455333	0.425924	0.409704	0.395336	0.388637	0.381936
97.5 % quantile release latencies (ms)	NaN	NaN	NaN	NaN	NaN	NaN	NaN	NaN	NaN	NaN	58.2323	29.8946	18.2144	10.8405	7.76318	5.20177	3.4547	2.3635	1.84399	1.50923	1.3284	1.17903	1.08174	0.996734	0.663549	0.558127	0.514078	0.476166	0.454077	0.439067	0.42796
Mean peak release rates (SVs/ms)	0.0018581	0.00443855	0.00945597	0.0187717	0.0343427	0.0563268	0.0884792	0.13794	0.2008	0.289008	0.397598	0.797817	1.44208	2.47249	3.96618	8.19837	14.7413	36.8831	74.4465	124.665	187.707	253.957	339.991	440.486	1593.66	2828.34	3904.89	5079.27	6157.44	6892.61	7909.61
2.5 % quantile peak release rates (SVs/ms)	0.000497822	0.00127779	0.00250322	0.00549158	0.00866355	0.0163342	0.0248927	0.0347497	0.0541552	0.0712984	0.113265	0.236906	0.432046	0.620876	1.02109	2.39483	4.39685	9.83026	20.7052	34.2724	46.0181	68.2338	93.16	131.439	431.919	781.138	1106.82	1350.15	1616.57	1806.42	2302.04
97.5 % quantile peak release rates (SVs/ms)	0.00407646	0.00981573	0.020277	0.0401034	0.0713057	0.118658	0.195229	0.304603	0.447829	0.648575	0.874213	1.75063	3.15857	5.55018	8.35095	18.0239	32.0036	77.6909	163.384	268.848	410.324	547.743	762.052	946.31	3689.09	6333.82	8430.42	10781.5	12875.6	15427.7	16925.4
Panel B1-2
Calcium concentrations (µM)	0.01	0.1	0.2	0.3	0.4	0.5	0.6	0.7	0.8	0.9	1	1.25	1.5	1.75	2	2.5	3	4	5	6	7	8	9	10	20	30	40	50	60	70	80
Median release latencies (ms)	NaN	NaN	NaN	NaN	NaN	NaN	NaN	NaN	NaN	NaN	25.6064	11.9241	7.12935	5.19967	3.9386	2.74771	2.16523	1.53175	1.22855	1.04786	0.933734	0.844232	0.784657	0.73241	0.529424	0.467973	0.439489	0.424061	0.414171	0.405493	0.401971
2.5 % quantile release latencies (ms)	NaN	NaN	NaN	NaN	NaN	NaN	NaN	NaN	NaN	NaN	9.24712	5.59368	3.9261	3.05236	2.52014	1.84203	1.49299	1.14024	0.933452	0.838912	0.753249	0.689287	0.651258	0.610972	0.473504	0.432009	0.413731	0.401943	0.394111	0.390675	0.387931
97.5 % quantile release latencies (ms)	NaN	NaN	NaN	NaN	NaN	NaN	NaN	NaN	NaN	NaN	93.2579	32.7374	18.3955	11.4712	8.15018	4.775	3.46579	2.28871	1.73788	1.41466	1.25276	1.09948	0.992224	0.933726	0.630612	0.541752	0.503972	0.480737	0.464693	0.449982	0.443491
Mean peak release rates (SVs/ms)	0.00172362	0.00226559	0.0035918	0.00626573	0.0115967	0.0207839	0.0348868	0.0612354	0.0980557	0.155944	0.231194	0.586677	1.3414	2.70886	4.7534	12.2899	26.5367	74.7624	158.26	252.042	363.812	461.594	596.207	700.13	1357.34	1712.94	1865.27	1983.01	2044.79	2071.04	2076.77
2.5 % quantile peak release rates (SVs/ms)	0.000503551	0.00055665	0.000977895	0.00174274	0.00375161	0.00593843	0.00964964	0.0173268	0.0254788	0.04365	0.0606017	0.152823	0.381091	0.727014	1.24581	3.4082	6.86825	22.1223	46.303	70.2264	99.0901	141.124	167.428	192.58	345.684	437.059	578.981	587.326	519.41	560.029	533.223
97.5 % quantile peak release rates (SVs/ms)	0.00361763	0.00517959	0.00759624	0.0134516	0.0257444	0.0462803	0.0772105	0.139298	0.213486	0.33685	0.538718	1.33259	2.90456	5.72066	10.4305	25.9838	59.4018	163.925	348.381	553.693	824.469	1005.54	1273.02	1597.44	2908.04	3801.15	3939.45	4257.38	4497.38	4437.43	4448.86
Panel B3
Number of dual bounds	0-1	2	3	4	5	6
Fraction of fusion events [Ca]= 0.5 uM	0.2612	0.3643	0.2496	0.0515	0.0004	0
Fraction of fusion events [Ca]= 1 uM	0.0555	0.2323	0.4468	0.2555	0.004	0
Fraction of fusion events [Ca]= 50 uM	0	0.0006	0.0245	0.5979	0.374	0.003
Fraction of fusion events [Ca]= 100 uM	0	0.0006	0.0228	0.5977	0.3767	0.0022
Fraction of fusion events [Ca]= 200 uM	0	0.0004	0.0193	0.5967	0.3809	0.0027
Fraction of fusion events [Ca]= 400 uM	0	0.0004	0.0195	0.601	0.3768	0.0023

## Sheet: Figure 2 - figure supplement 6
Figure 2 - figure supplement 5
Panel B - simplified
Calcium concentrations (µM)	0.01	0.1	0.2	0.3	0.4	0.5	0.6	0.7	0.8	0.9	1	1.25	1.5	1.75	2	2.5	3	4	5	6	7	8	9	10	20	30	40	50	60	70	80
Median release latencies (ms)	NaN	NaN	NaN	NaN	NaN	NaN	NaN	NaN	NaN	NaN	26.957	13.7889	8.36678	6.08947	4.53732	3.0804	2.38444	1.60494	1.25791	1.03683	0.917377	0.822497	0.750336	0.700548	0.503502	0.457469	0.434364	0.423244	0.416399	0.411052	0.40789
2.5 % quantile release latencies (ms)	NaN	NaN	NaN	NaN	NaN	NaN	NaN	NaN	NaN	NaN	10.7939	6.7125	4.64307	3.61955	2.90094	2.06746	1.64172	1.18227	0.954533	0.819683	0.730304	0.67145	0.62978	0.590562	0.458981	0.427008	0.411226	0.4046	0.400213	0.395542	0.394062
97.5 % quantile release latencies (ms)	NaN	NaN	NaN	NaN	NaN	NaN	NaN	NaN	NaN	NaN	79.2354	37.0184	18.8591	12.0826	8.69702	5.36443	3.97743	2.39931	1.78373	1.39552	1.22939	1.04977	0.955712	0.863785	0.595814	0.518253	0.488186	0.471855	0.465118	0.459301	0.452831
Mean peak release rates (SVs/ms)	0.00167805	0.0019783	0.0029817	0.00535381	0.00985313	0.0187091	0.0332637	0.0583667	0.0965442	0.150626	0.241698	0.6215	1.45361	2.9222	5.29835	13.8523	29.195	80.7688	161.017	254.702	377.292	474.441	584.224	691.693	1281.34	1505.18	1497.13	1593.01	1624.81	1618.1	1640.99
2.5 % quantile peak release rates (SVs/ms)	0.000490629	0.000562832	0.000814807	0.00128941	0.00303414	0.00551656	0.00895847	0.017195	0.0286478	0.0411754	0.0633978	0.184309	0.364825	0.740023	1.39537	3.43281	8.42049	21.9221	47.7017	75.5787	112.154	128.642	171.15	189.863	342.36	423.561	416.853	441.921	410.143	437.317	466.345
97.5 % quantile peak release rates (SVs/ms)	0.00367357	0.00431851	0.00654256	0.0115854	0.0231166	0.0414605	0.0745477	0.126792	0.223101	0.324914	0.518669	1.35832	3.3136	6.129	11.5849	29.4481	64.0389	174.109	343.899	547.816	807.471	1062.7	1268.79	1512.24	2937.42	3334.05	3300.76	3433.78	3449.85	3691.79	3576.45
Panel B - extended
Calcium concentrations (µM)	0.01	0.1	0.2	0.3	0.4	0.5	0.6	0.7	0.8	0.9	1	1.25	1.5	1.75	2	2.5	3	4	5	6	7	8	9	10	20	30	40	50	60	70	80
Median release latencies (ms)	NaN	NaN	NaN	NaN	NaN	NaN	NaN	NaN	NaN	NaN	27.3433	13.4016	8.30055	6.08207	4.57693	3.10216	2.37274	1.59739	1.23872	1.03274	0.906428	0.811156	0.748845	0.696042	0.505736	0.455114	0.43349	0.422622	0.415933	0.409849	0.408337
2.5 % quantile release latencies (ms)	NaN	NaN	NaN	NaN	NaN	NaN	NaN	NaN	NaN	NaN	10.9756	6.76456	4.70954	3.59376	2.90593	2.03827	1.59837	1.16665	0.927514	0.820034	0.728121	0.66193	0.623123	0.583772	0.458787	0.425218	0.41178	0.403045	0.39734	0.395132	0.393105
97.5 % quantile release latencies (ms)	NaN	NaN	NaN	NaN	NaN	NaN	NaN	NaN	NaN	NaN	93.7702	33.2375	19.157	12.3891	9.01063	5.35518	3.82944	2.42634	1.77769	1.40828	1.22367	1.05853	0.945618	0.883343	0.591415	0.517175	0.489336	0.473796	0.463803	0.454076	0.451103
Mean peak release rates (SVs/ms)	0.00171202	0.00200869	0.00298728	0.00523747	0.0100248	0.0186609	0.0324027	0.0585252	0.0960028	0.155866	0.235277	0.619162	1.45387	2.99025	5.3057	13.793	29.5342	80.8542	167.168	262.315	375.079	472.446	606.006	706.349	1245.41	1468.53	1538.34	1597.58	1622.45	1626.09	1618.28
2.5 % quantile peak release rates (SVs/ms)	0.000500162	0.00049353	0.000813308	0.00145674	0.00324309	0.00533182	0.00896254	0.0165599	0.0249454	0.0436282	0.0616719	0.161285	0.413044	0.802536	1.39056	3.82505	7.64406	23.9248	48.9093	73.0886	102.159	144.442	170.179	194.291	317.177	374.699	477.502	473.17	412.128	439.712	415.504
97.5 % quantile peak release rates (SVs/ms)	0.00359328	0.00459225	0.00631773	0.0112441	0.0222548	0.0415527	0.0717128	0.133133	0.209016	0.336681	0.548231	1.40637	3.1481	6.31492	11.6425	29.1618	66.1116	177.282	367.991	576.26	850.003	1029.18	1293.94	1611.63	2668.23	3258.79	3248.98	3429.89	3568.47	3484.09	3466.68

## Sheet: Figure 2 - figure supplement 7
Figure 2 - figure supplement 5
Calcium concentrations (µM)	0.01	0.1	0.2	0.3	0.4	0.5	0.6	0.7	0.8	0.9	1	1.25	1.5	1.75	2	2.5	3	4	5	6	7	8	9	10	20	30	40	50	60	70	80
Panel A
Release latencies (ms)
Factor 1/5	NaN	NaN	NaN	NaN	NaN	NaN	NaN	NaN	NaN	NaN	55.0965	33.3189	22.9587	17.6752	13.5933	9.22768	6.91324	4.34576	3.14212	2.45325	2.033	1.72026	1.51588	1.34579	0.742565	0.587328	0.521454	0.487288	0.466169	0.449032	0.441522
Factor 1/3	NaN	NaN	NaN	NaN	NaN	NaN	NaN	NaN	NaN	NaN	41.9805	24.9072	16.5334	12.542	9.58614	6.46184	4.7454	3.10276	2.26485	1.84016	1.50976	1.3206	1.15937	1.05577	0.632137	0.530526	0.485207	0.458115	0.443318	0.43426	0.425563
Factor 1/2	NaN	NaN	NaN	NaN	NaN	NaN	NaN	NaN	NaN	NaN	36.1234	19.9015	13.0149	9.46351	7.25177	4.95452	3.62753	2.41334	1.78304	1.46148	1.23467	1.08319	0.979736	0.892687	0.578558	0.495588	0.462137	0.441812	0.430277	0.423773	0.418186
Factor 1	NaN	NaN	NaN	NaN	NaN	NaN	NaN	NaN	NaN	NaN	27.6187	13.8436	8.58601	6.12619	4.7354	3.12868	2.38566	1.60414	1.26585	1.04785	0.903064	0.812284	0.754681	0.699536	0.505062	0.456294	0.43477	0.423336	0.415374	0.410942	0.408013
Factor 2	NaN	NaN	NaN	NaN	NaN	NaN	NaN	NaN	NaN	NaN	21.3569	10.1963	5.76544	4.0642	3.13374	2.07945	1.61817	1.15086	0.919228	0.795772	0.716221	0.655723	0.614127	0.578944	0.462526	0.431238	0.417981	0.410302	0.407633	0.404322	0.402906
Factor 3	NaN	NaN	NaN	NaN	NaN	NaN	NaN	NaN	NaN	NaN	19.7854	8.21717	4.90306	3.31108	2.47349	1.68551	1.33196	0.972044	0.796874	0.701038	0.63384	0.595418	0.559171	0.533239	0.445226	0.4211	0.411924	0.40668	0.402685	0.401812	0.400906
Factor 5	NaN	NaN	NaN	NaN	NaN	NaN	NaN	NaN	NaN	NaN	18.4434	7.09972	4.01723	2.56226	1.92521	1.35313	1.08393	0.80025	0.675523	0.606919	0.561564	0.532572	0.511831	0.493312	0.429463	0.412298	0.405421	0.402652	0.401623	0.400663	0.399524
Peak release rates (SVs/ms)
Factor 1/5	0.00166393	0.00200624	0.00292939	0.00500477	0.00920498	0.0163701	0.028371	0.0452183	0.0733686	0.111236	0.162877	0.38242	0.796811	1.40821	2.42275	5.69328	10.8283	27.7296	53.9488	83.8777	128.326	170.303	224.475	273.664	810.455	1185.73	1354.68	1509	1570.58	1566.5	1536.74
Factor 1/3	0.00170092	0.002003	0.00301113	0.00521909	0.00927333	0.0161587	0.0293959	0.0486163	0.0793107	0.119503	0.181343	0.441793	0.986906	1.78175	3.13533	7.83655	15.3835	39.8953	78.0517	132.345	182.215	248.23	330.97	388.263	1048.45	1345.78	1478.27	1603.48	1641.97	1584.96	1616.31
Factor 1/2	0.00168293	0.00202744	0.00288471	0.00516273	0.00937752	0.0173663	0.0305839	0.0511636	0.0826252	0.128271	0.202664	0.507763	1.08474	2.24629	3.89757	9.73384	19.92	52.0927	105.738	172.381	254.064	336.542	427.339	504.257	1121.7	1422.21	1528.57	1542.45	1543.44	1603.27	1608.33
Factor 1	0.00168754	0.00197855	0.002952	0.00525122	0.00950388	0.0178041	0.032619	0.0552224	0.0910265	0.148358	0.238576	0.627337	1.40318	2.88271	5.44117	14.2034	29.8339	84.7109	162.871	269.045	375.356	466.113	606.346	691.387	1312.25	1483.6	1556.16	1600.7	1619.65	1643.49	1660.33
Factor 2	0.00167716	0.00197523	0.00293554	0.00521414	0.00998792	0.0185226	0.0354828	0.0597603	0.103061	0.173034	0.278176	0.747395	1.75602	3.69068	7.05917	19.0551	41.4898	116.926	226.691	373.414	507.144	628.533	753.8	866.44	1396.27	1540.83	1554.4	1596.11	1603.53	1614.28	1643.48
Factor 3	0.00169482	0.0019703	0.00299482	0.00525841	0.0100253	0.0186926	0.0346542	0.0638572	0.108701	0.181748	0.287548	0.812016	1.99453	4.19115	7.71634	22.009	46.0917	135.704	260.835	412.996	556.53	706.209	828.629	905.264	1434.42	1530.95	1563.58	1624.55	1622.6	1593.42	1637.11
Factor 5	0.00167156	0.00195641	0.00296819	0.00516913	0.0100397	0.0195021	0.0351805	0.064041	0.113153	0.18933	0.310576	0.9031	2.21663	4.48596	8.76012	24.4081	52.6674	153.524	292.304	468.882	618.826	763.884	864.083	994.358	1459.07	1567.44	1543.31	1582.84	1646.44	1662.69	1661.72
Panel B
Release latencies (ms)
Factor 1/5	NaN	NaN	NaN	NaN	NaN	NaN	NaN	NaN	NaN	NaN	26.9855	13.5465	8.82752	6.18587	4.74764	3.17817	2.45022	1.6658	1.28197	1.07335	0.933272	0.835752	0.761937	0.715888	0.509374	0.457524	0.437001	0.42375	0.417715	0.413205	0.408521
Factor 1/3	NaN	NaN	NaN	NaN	NaN	NaN	NaN	NaN	NaN	NaN	27.1287	13.8041	8.48753	6.08317	4.72912	3.24039	2.43265	1.63468	1.29574	1.06261	0.92879	0.831509	0.765967	0.703885	0.510585	0.458279	0.436323	0.423423	0.416269	0.411592	0.409036
Factor 1/2	NaN	NaN	NaN	NaN	NaN	NaN	NaN	NaN	NaN	NaN	26.878	13.7669	8.49667	6.16577	4.74081	3.16486	2.38841	1.64448	1.27356	1.06709	0.922089	0.82358	0.757069	0.704283	0.508469	0.456642	0.436233	0.423253	0.416627	0.411869	0.408413
Factor 1	NaN	NaN	NaN	NaN	NaN	NaN	NaN	NaN	NaN	NaN	27.6424	13.9356	8.49804	6.07185	4.63325	3.15585	2.36201	1.62342	1.25993	1.0351	0.908362	0.820014	0.747209	0.696417	0.505929	0.456012	0.435228	0.423203	0.415745	0.411634	0.408355
Factor 2	NaN	NaN	NaN	NaN	NaN	NaN	NaN	NaN	NaN	NaN	27.0207	13.7532	8.54789	6.10303	4.67174	3.04847	2.32198	1.58454	1.23555	1.03164	0.893796	0.803673	0.746033	0.691386	0.501812	0.453735	0.433325	0.42098	0.415327	0.409534	0.407209
Factor 3	NaN	NaN	NaN	NaN	NaN	NaN	NaN	NaN	NaN	NaN	27.1562	13.8609	8.38506	5.9979	4.50542	3.11168	2.35694	1.60123	1.22941	1.02968	0.89945	0.805319	0.734909	0.685153	0.498993	0.4531	0.431835	0.420795	0.413633	0.409565	0.406625
Factor 5	NaN	NaN	NaN	NaN	NaN	NaN	NaN	NaN	NaN	NaN	27.2233	13.7083	8.36878	6.06699	4.60106	3.14624	2.37948	1.58088	1.21837	1.01709	0.886546	0.796275	0.727627	0.683117	0.496837	0.449445	0.430319	0.418723	0.412274	0.407282	0.405061
Peak release rates (SVs/ms)
Factor 1/5	0.00172456	0.0019796	0.00286048	0.00508697	0.00952879	0.0176691	0.032187	0.0553358	0.0936758	0.153479	0.23557	0.613726	1.41127	2.83794	5.30931	13.998	28.0862	74.8403	138.413	204.822	262.903	313.871	348.822	414.959	551.88	581.349	579.156	604.121	582.757	594.765	596.728
Factor 1/3	0.00170821	0.00197513	0.0029213	0.00521614	0.00953565	0.0176659	0.0318623	0.0547734	0.0954073	0.148511	0.235778	0.643724	1.40039	2.91451	5.19164	13.649	28.7165	78.1095	151.335	231.715	320.083	380.291	457.87	510.963	788.105	844.244	854.682	844.053	876.863	893.89	847.959
Factor 1/2	0.00166283	0.00196733	0.00302979	0.00539351	0.00985523	0.017819	0.0316442	0.0553819	0.0923067	0.152889	0.231106	0.639364	1.37295	2.87993	5.32324	13.883	29.0518	80.4751	159.668	255.246	346.952	439.567	516.67	575.66	944.582	1076.63	1104.49	1129.35	1100.03	1122.32	1169.03
Factor 1	0.00167791	0.00203016	0.00289497	0.00518604	0.00967865	0.0174986	0.0316862	0.0561915	0.0950216	0.149417	0.234497	0.630572	1.47975	2.89907	5.37934	13.9693	29.4912	80.1265	170.049	260.799	378.066	489.519	600.211	716.009	1294.75	1477.58	1519.1	1583.79	1636.55	1660.2	1625.69
Factor 2	0.00167278	0.00196526	0.00293116	0.00517482	0.00993124	0.0176396	0.0321982	0.0560704	0.0962093	0.153674	0.236012	0.633412	1.4164	2.95815	5.34186	14.3977	29.8407	87.3985	167.244	270.307	387.678	520.67	632.787	783.206	1576.45	1884.74	2048.81	2078.72	2173.02	2156.2	2123.48
Factor 3	0.00167589	0.00196939	0.00301208	0.00512876	0.00976131	0.0181908	0.0325992	0.0561035	0.0927661	0.146855	0.237406	0.651627	1.45686	2.95787	5.39095	14.6724	30.8796	83.7808	165.697	278.95	390.93	530.423	688.519	767.48	1711.4	2061.3	2198.52	2327.48	2332.01	2280.85	2387.63
Factor 5	0.00168513	0.00197373	0.00293607	0.00531558	0.00980031	0.0181001	0.0317728	0.0560159	0.0947841	0.151511	0.235235	0.622609	1.42323	2.96232	5.35292	14.4804	30.5776	85.1096	167.113	278.013	413.888	539.773	667.082	805.93	1809.8	2197.78	2431.05	2496.12	2638.79	2629.32	2674.55
Panel C
Release latencies (ms)
Factor 1/5	NaN	NaN	NaN	NaN	NaN	NaN	NaN	NaN	NaN	NaN	204.151	94.6388	51.754	30.5397	19.3661	10.3608	6.8411	3.97324	2.89677	2.27564	1.85036	1.62246	1.45011	1.31889	0.841458	0.734149	0.69079	0.66928	0.659439	0.650283	0.642325
Factor 1/3	NaN	NaN	NaN	NaN	NaN	NaN	NaN	NaN	NaN	NaN	104.591	46.1646	24.1981	14.6771	10.6051	6.33712	4.53352	2.82424	2.04495	1.66391	1.40728	1.22632	1.09982	1.01642	0.663181	0.574278	0.539801	0.521922	0.514522	0.506879	0.508014
Factor 1/2	NaN	NaN	NaN	NaN	NaN	NaN	NaN	NaN	NaN	NaN	59.2356	27.8017	15.441	10.0518	7.3404	4.72042	3.43277	2.21328	1.64151	1.36145	1.15144	1.01352	0.931751	0.861864	0.577928	0.512553	0.480599	0.465935	0.453814	0.44954	0.44701
Factor 1	NaN	NaN	NaN	NaN	NaN	NaN	NaN	NaN	NaN	NaN	26.7337	13.5172	8.8708	6.00209	4.66559	3.14147	2.4003	1.60575	1.25086	1.05197	0.905544	0.815852	0.748373	0.698713	0.505208	0.455746	0.433948	0.423713	0.41533	0.411481	0.407543
Factor 2	NaN	NaN	NaN	NaN	NaN	NaN	NaN	NaN	NaN	NaN	16.4191	8.97886	5.84152	4.35311	3.44116	2.38802	1.85587	1.30197	1.03408	0.88733	0.785615	0.708151	0.661509	0.617156	0.470078	0.433137	0.41628	0.408506	0.402899	0.399447	0.396558
Factor 3	NaN	NaN	NaN	NaN	NaN	NaN	NaN	NaN	NaN	NaN	13.1616	7.46473	5.06243	3.90744	3.03265	2.19677	1.68824	1.21437	0.966976	0.819599	0.734652	0.671881	0.62747	0.593155	0.461163	0.426306	0.411882	0.403803	0.399201	0.395196	0.393198
Factor 5	NaN	NaN	NaN	NaN	NaN	NaN	NaN	NaN	NaN	NaN	10.9896	6.47249	4.48389	3.43956	2.76935	1.97609	1.55749	1.11825	0.912245	0.784466	0.699615	0.640793	0.600124	0.569267	0.450912	0.420872	0.407484	0.400977	0.396187	0.393096	0.391516
Peak release rates (SVs/ms)
Factor 1/5	0.00167	0.00181115	0.00201028	0.00260498	0.00342019	0.00465589	0.00655019	0.00933961	0.0132435	0.0187004	0.0257016	0.0552753	0.111583	0.213807	0.376317	1.05373	2.31658	8.2486	20.5725	38.5854	65.4911	94.8665	127.703	159.198	398.304	505.294	550.937	559.188	573.242	581.248	589.176
Factor 1/3	0.00169443	0.00176602	0.00222037	0.00298315	0.0044725	0.00674373	0.0105993	0.016256	0.0237935	0.0353575	0.0533073	0.120351	0.269908	0.548502	0.965248	2.74659	5.98528	20.3084	45.7518	86.2645	130.409	179.641	232.072	289.398	625.916	753.041	801.054	833.959	845.872	850.407	833.506
Factor 1/2	0.00167655	0.00189823	0.0024243	0.00384982	0.00600164	0.00994038	0.0161104	0.0260614	0.0412346	0.0637623	0.0943063	0.24204	0.525316	1.05456	1.95456	5.25007	11.8409	36.4591	79.0795	137.126	198.674	275.472	348.942	406.163	838.872	1011.98	1058.19	1087.69	1082.7	1125.61	1131.54
Factor 1	0.0017101	0.00197735	0.00296561	0.00529597	0.0097568	0.0179561	0.03205	0.0556624	0.0931741	0.144283	0.234254	0.619741	1.42178	2.85741	5.25378	14.336	29.6816	80.4388	165.216	251.281	374.078	485.418	605.369	715.161	1278.73	1481.85	1498.27	1624.69	1620.64	1553.73	1625.11
Factor 2	0.00168487	0.00205997	0.0035544	0.00715818	0.0152931	0.0310826	0.0574599	0.106242	0.184263	0.309812	0.485735	1.30969	3.17614	6.32357	11.4766	28.2849	56.5056	144.499	265.756	412.236	554.787	707.2	863.29	1020.93	1816.53	1966.49	2071.19	2200.48	2091.34	2177.08	2129.47
Factor 3	0.00168448	0.00213306	0.00393466	0.00825212	0.0183606	0.037695	0.0765527	0.141454	0.242062	0.41085	0.678832	1.87648	4.22838	8.67595	15.0252	38.1297	73.2665	178.745	320.539	496.074	651.521	829.831	991.798	1148.51	2014.29	2233.54	2352.71	2361.36	2433.18	2468.59	2493.35
Factor 5	0.00169837	0.00217819	0.00429107	0.00956075	0.022441	0.0480666	0.0962188	0.186286	0.332836	0.56038	0.915296	2.61543	5.7818	10.9048	19.9453	48.2022	94.5402	211.261	376.776	571.814	758.084	917.076	1116.36	1259.81	2240.17	2555.6	2671.95	2735.84	2761.88	2700.96	2736.42
Panel D
Release latencies (ms)
Factor 1/5	NaN	NaN	NaN	NaN	NaN	NaN	NaN	NaN	NaN	NaN	422.171	215.558	112.738	67.1356	42.6391	19.7255	11.9953	6.5733	4.50487	3.47179	2.83904	2.47865	2.1779	1.99275	1.24449	1.08704	1.02957	1.01494	0.977659	0.971388	0.959428
Factor 1/3	NaN	NaN	NaN	NaN	NaN	NaN	NaN	NaN	NaN	NaN	174.326	82.9892	41.2908	24.1127	15.9343	8.85547	6.17452	3.72321	2.67502	2.16443	1.80814	1.58108	1.39668	1.26969	0.808008	0.705186	0.65774	0.645424	0.636191	0.629009	0.619381
Factor 1/2	NaN	NaN	NaN	NaN	NaN	NaN	NaN	NaN	NaN	NaN	86.758	36.7118	19.8235	12.2722	8.80551	5.54276	4.05178	2.61088	1.96507	1.58465	1.32081	1.18854	1.06963	0.971928	0.648458	0.559999	0.528152	0.506527	0.501528	0.494147	0.490135
Factor 1	NaN	NaN	NaN	NaN	NaN	NaN	NaN	NaN	NaN	NaN	27.6495	13.5843	8.51379	6.06948	4.60402	3.16643	2.39194	1.64753	1.25096	1.04241	0.904823	0.823308	0.754858	0.701685	0.507012	0.455442	0.434351	0.422296	0.416728	0.411077	0.407442
Factor 2	NaN	NaN	NaN	NaN	NaN	NaN	NaN	NaN	NaN	NaN	13.0279	7.5874	5.43826	4.00608	3.15205	2.21645	1.70692	1.1773	0.932964	0.797465	0.69346	0.641125	0.597543	0.564634	0.446433	0.41797	0.404708	0.399191	0.394231	0.392054	0.390743
Factor 3	NaN	NaN	NaN	NaN	NaN	NaN	NaN	NaN	NaN	NaN	9.38293	5.86797	4.32195	3.36161	2.64841	1.90833	1.48844	1.06133	0.836347	0.72309	0.636473	0.589388	0.548873	0.523688	0.42862	0.406581	0.396605	0.392051	0.39036	0.385918	0.383723
Factor 5	NaN	NaN	NaN	NaN	NaN	NaN	NaN	NaN	NaN	NaN	6.10308	4.15751	3.16425	2.51298	2.11444	1.58629	1.28841	0.933503	0.769893	0.664493	0.596157	0.553631	0.520678	0.49516	0.41516	0.397696	0.391265	0.386036	0.382907	0.381784	0.381262
Peak release rates (SVs/ms)
Factor 1/5	0.00172385	0.0017347	0.00188891	0.00215584	0.00269724	0.00319615	0.00419531	0.0055748	0.00723167	0.00951226	0.0127581	0.0255632	0.0481502	0.0840352	0.144316	0.338342	0.703162	1.98449	3.77195	6.0956	8.39513	10.7451	12.9309	14.2976	23.335	25.506	26.2287	27.5356	27.269	27.4605	27.4567
Factor 1/3	0.0016487	0.00181131	0.00206389	0.00258214	0.00350291	0.00481187	0.0068045	0.00984169	0.0143658	0.0208207	0.0304967	0.0696537	0.144911	0.283033	0.499867	1.30351	2.79862	7.8504	16.292	25.7859	35.202	45.2943	55.3546	62.7984	100.288	114.385	116.921	117.344	119.57	122.442	120.058
Factor 1/2	0.0016878	0.00181264	0.00219413	0.00312726	0.00465261	0.00705068	0.0114459	0.0174918	0.0282429	0.042272	0.0657971	0.161194	0.36126	0.718898	1.32205	3.60514	7.97909	22.6778	44.6004	72.6561	104.648	133.096	156.933	180.418	299.382	339.068	352.783	354.66	358.598	361.859	352.863
Factor 1	0.00173713	0.00192311	0.00295476	0.00525525	0.00975205	0.0178381	0.0325379	0.0546685	0.0926194	0.155506	0.234523	0.611784	1.4688	2.91616	5.52464	13.9715	30.2455	84.3929	162.968	269.448	369.428	489.76	602.393	696.566	1332.22	1476.32	1568.73	1578.07	1554.86	1594.01	1663.63
Factor 2	0.00165586	0.00231686	0.00461805	0.0109149	0.0236498	0.0475971	0.0912696	0.162244	0.273908	0.431461	0.642429	1.58615	3.39007	6.4335	11.0141	25.9865	52.275	135.329	252.393	403.388	586.991	763.888	962.223	1144.35	2447.36	2873.06	2960.84	3060.94	3201.33	3138.11	3192.77
Factor 3	0.00164815	0.00260379	0.00671323	0.0172602	0.0414216	0.0894295	0.168151	0.300575	0.510938	0.767182	1.1831	2.82263	5.5926	9.80893	16.1513	34.9128	66.2332	158.548	290.156	460.733	615.927	837.896	1013.31	1205.61	2579.39	3150.93	3818.64	4556.65	5134.5	5531.73	5787.89
Factor 5	0.00168413	0.00333895	0.0112107	0.0331002	0.089547	0.191492	0.364123	0.632259	1.06717	1.60507	2.46211	5.44268	10.725	18.079	27.203	56.9949	94.0197	204.694	352.761	520.55	703.624	896.494	1134.27	1331.86	2713.46	3671.38	5767.48	7779.29	10141	11764.6	12457.2
Panel E
Release latencies (ms)
Factor 1/5	NaN	NaN	NaN	NaN	NaN	NaN	NaN	NaN	NaN	NaN	27.3453	13.28	8.20957	5.76526	4.29979	2.86221	2.08772	1.34331	0.946738	0.73819	0.600601	0.519086	0.450636	0.397463	0.20279	0.15122	0.13013	0.118074	0.112506	0.106855	0.10322
Factor 1/3	NaN	NaN	NaN	NaN	NaN	NaN	NaN	NaN	NaN	NaN	27.396	13.3307	8.26027	5.81596	4.3505	2.91291	2.13842	1.39401	0.997441	0.788893	0.651305	0.56979	0.50134	0.448166	0.253494	0.201924	0.180833	0.168778	0.16321	0.157559	0.153923
Factor 1/2	NaN	NaN	NaN	NaN	NaN	NaN	NaN	NaN	NaN	NaN	27.4594	13.3941	8.32365	5.87934	4.41388	2.97629	2.2018	1.45739	1.06082	0.852273	0.714684	0.63317	0.56472	0.511546	0.316874	0.265303	0.244213	0.232158	0.226589	0.220938	0.217303
Factor 1	NaN	NaN	NaN	NaN	NaN	NaN	NaN	NaN	NaN	NaN	27.6495	13.5843	8.51379	6.06948	4.60402	3.16643	2.39194	1.64753	1.25096	1.04241	0.904823	0.823308	0.754858	0.701685	0.507012	0.455442	0.434351	0.422296	0.416728	0.411077	0.407442
Factor 2	NaN	NaN	NaN	NaN	NaN	NaN	NaN	NaN	NaN	NaN	28.0298	13.9645	8.89407	6.44976	4.98429	3.54671	2.77222	2.02781	1.63124	1.42269	1.2851	1.20359	1.13514	1.08196	0.88729	0.835719	0.814629	0.802574	0.797005	0.791354	0.787719
Factor 3	NaN	NaN	NaN	NaN	NaN	NaN	NaN	NaN	NaN	NaN	28.4101	14.3448	9.27435	6.83004	5.36457	3.92699	3.1525	2.40809	2.01151	1.80297	1.66538	1.58386	1.51541	1.46224	1.26757	1.216	1.19491	1.18285	1.17728	1.17163	1.168
Factor 5	NaN	NaN	NaN	NaN	NaN	NaN	NaN	NaN	NaN	NaN	29.1706	15.1054	10.0349	7.59059	6.12512	4.68754	3.91305	3.16864	2.77207	2.56352	2.42593	2.34442	2.27597	2.22279	2.02812	1.97655	1.95546	1.94341	1.93784	1.93219	1.92855
Peak release rates (SVs/ms)
Factor 1/5	0.00173713	0.00192311	0.00295476	0.00525525	0.00975205	0.0178381	0.0325379	0.0546685	0.0926194	0.155506	0.234523	0.611784	1.4688	2.91616	5.52464	13.9715	30.2455	84.3929	162.968	269.448	369.428	489.76	602.393	696.566	1332.22	1476.32	1568.73	1578.07	1554.86	1594.01	1663.63
Factor 1/3	0.00173713	0.00192311	0.00295476	0.00525525	0.00975205	0.0178381	0.0325379	0.0546685	0.0926194	0.155506	0.234523	0.611784	1.4688	2.91616	5.52464	13.9715	30.2455	84.3929	162.968	269.448	369.428	489.76	602.393	696.566	1332.22	1476.32	1568.73	1578.07	1554.86	1594.01	1663.63
Factor 1/2	0.00173713	0.00192311	0.00295476	0.00525525	0.00975205	0.0178381	0.0325379	0.0546685	0.0926194	0.155506	0.234523	0.611784	1.4688	2.91616	5.52464	13.9715	30.2455	84.3929	162.968	269.448	369.428	489.76	602.393	696.566	1332.22	1476.32	1568.73	1578.07	1554.86	1594.01	1663.63
Factor 1	0.00173713	0.00192311	0.00295476	0.00525525	0.00975205	0.0178381	0.0325379	0.0546685	0.0926194	0.155506	0.234523	0.611784	1.4688	2.91616	5.52464	13.9715	30.2455	84.3929	162.968	269.448	369.428	489.76	602.393	696.566	1332.22	1476.32	1568.73	1578.07	1554.86	1594.01	1663.63
Factor 2	0.00173713	0.00192311	0.00295476	0.00525525	0.00975205	0.0178381	0.0325379	0.0546685	0.0926194	0.155506	0.234523	0.611784	1.4688	2.91616	5.52464	13.9715	30.2455	84.3929	162.968	269.448	369.428	489.76	602.393	696.566	1332.22	1476.32	1568.73	1578.07	1554.86	1594.01	1663.63
Factor 3	0.00173713	0.00192311	0.00295476	0.00525525	0.00975205	0.0178381	0.0325379	0.0546685	0.0926194	0.155506	0.234523	0.611784	1.4688	2.91616	5.52464	13.9715	30.2455	84.3929	162.968	269.448	369.428	489.76	602.393	696.566	1332.22	1476.32	1568.73	1578.07	1554.86	1594.01	1663.63
Factor 5	0.00173713	0.00192311	0.00295476	0.00525525	0.00975205	0.0178381	0.0325379	0.0546685	0.0926194	0.155506	0.234523	0.611784	1.4688	2.91616	5.52464	13.9715	30.2455	84.3929	162.968	269.448	369.428	489.76	602.393	696.566	1332.22	1476.32	1568.73	1578.07	1554.86	1594.01	1663.63
