# Supplementary material for: Allosteric stabilization of calcium and phosphoinositide dual binding engages several synaptotagmins in fast exocytosis
Source: eLife. 2022 Aug 5;11:e74810. doi: 10.7554/eLife.74810 (PMC9489213; doi:10.7554/eLife.74810)
Supplement: Figure 3—source data 1. [file elife-74810-fig3-data1.xlsx]

## Sheet: Figure 3
Figure 3
Panel A
	0 PIP2 bound	1 PIP2 bound	2 PIP2 bound	3 PIP2 bound	>0 Dual bounds
Steady state fraction	0.1695	0.4229	0.3284	0.0789	0.0003

## Sheet: Figure 3 - Figure supplement 1
Figure 3 - Figure supplement 1
Panel A
	0 PIP2 bound	1 PIP2 bound	2 PIP2 bound	3 PIP2 bound	4-6 PIP2 bound	>0 Dual bounds
Steady state fraction	0.3902	0.4073	0.1654	0.0333	0.0037	0.0002
