# Supplementary material for: Allosteric stabilization of calcium and phosphoinositide dual binding engages several synaptotagmins in fast exocytosis
Source: eLife. 2022 Aug 5;11:e74810. doi: 10.7554/eLife.74810 (PMC9489213; doi:10.7554/eLife.74810)
Supplement: Figure 4—figure supplement 1—source data 1. [file elife-74810-fig4-figsupp1-data1.xlsx]

## Sheet: Figure 4 - figure supplement 1
Figure 4 - figure supplement 1
Calcium (µM)	0.01	0.1	0.2	0.3	0.4	0.5	0.6	0.7	0.8	0.9	1	1.25	1.5	1.75	2	2.5	3	4	5	6	7	8	9	10	20	30	40	50	60	70	80
M_slots = 3
Median release latencies (ms)	NaN	NaN	NaN	NaN	NaN	NaN	NaN	NaN	NaN	NaN	73.5127	38.5936	22.1055	13.7724	9.38831	4.54537	2.49103	1.12012	0.697702	0.555365	0.491981	0.459526	0.44313	0.434116	0.407906	0.40452	0.403899	0.403746	0.403686	0.403653	0.403642
2.5 % quantile release latencies (ms)	NaN	NaN	NaN	NaN	NaN	NaN	NaN	NaN	NaN	NaN	18.3539	9.46138	6.21722	4.16586	2.53527	1.43702	0.916233	0.576274	0.485709	0.449786	0.43439	0.424665	0.41951	0.417258	0.404684	0.40384	0.403674	0.403642	0.403624	0.40362	0.403616
97.5 % quantile release latencies (ms)	NaN	NaN	NaN	NaN	NaN	NaN	NaN	NaN	NaN	NaN	300.346	164.723	90.2513	53.3972	39.9354	17.051	8.23687	3.37462	1.62117	1.07007	0.806677	0.629065	0.528279	0.499294	0.416696	0.407463	0.404968	0.404228	0.403932	0.403803	0.403753
Mean peak release rates (SVs/ms)	0.0017002	0.00208212	0.00331104	0.00565618	0.00884999	0.0136025	0.0198277	0.0278286	0.0396106	0.0515291	0.0693013	0.130768	0.223653	0.374305	0.588511	1.29244	2.46814	7.28987	17.0146	35.4667	64.6939	106.241	167.86	254.002	3468.66	14196.9	33066.7	59449.3	100380	145574	179512
2.5 % quantile peak release rates (SVs/ms)	0.000460915	0.000522327	0.00082611	0.00154303	0.00232009	0.00388704	0.00499882	0.007794	0.0106189	0.0146925	0.0187581	0.036787	0.0581576	0.103832	0.163368	0.396447	0.785991	1.99937	5.41057	9.79758	19.3966	26.7407	49.3845	67.1389	1045.55	3943.91	7562.53	17236.6	28037.6	42608.5	50361.9
97.5 % quantile peak release rates (SVs/ms)	0.00382385	0.004601	0.00722425	0.0126762	0.0194225	0.0281055	0.0429367	0.0595456	0.0845109	0.111009	0.149133	0.278937	0.489292	0.820162	1.27462	2.92911	5.23389	15.6513	38.2143	76.9979	141.768	234.572	364.754	561.18	7854.31	31547.9	72583.5	127526	213586	316324	391049
