# Supplementary material for: Allosteric stabilization of calcium and phosphoinositide dual binding engages several synaptotagmins in fast exocytosis
Source: eLife. 2022 Aug 5;11:e74810. doi: 10.7554/eLife.74810 (PMC9489213; doi:10.7554/eLife.74810)
Supplement: Figure 5—source data 1. [file elife-74810-fig5-data1.xlsx]

## Sheet: Figure 5
Figure 5
Panel A
Release latencies
Calcium (µM)	1	1.25	1.5	1.75	2	2.5	3	4	5	6	7	8	9	10	20	30	40	50	60	70	80
Release latencies, 1 syt (ms)	1148.3	832.341	650.505	530.668	396.33	273.429	213.469	133.879	92.8907	80.555	60.6477	53.871	47.9806	43.1497	30.1118	27.7737	26.9259	25.248	25.8691	26.1644	25.8269
Release latencies, 2 syt (ms)	493.335	309.518	169.928	117.118	77.8999	40.1496	25.2782	13.0437	8.74976	6.68224	5.39954	4.61604	4.20745	3.74928	2.49737	2.19973	2.06706	2.05507	2.03937	2.00155	2.03211
Release latencies, 3 syt (ms)	280.306	145.263	80.825	47.7823	31.3779	15.8785	10.3947	5.6046	3.93572	3.03842	2.52924	2.15699	1.91591	1.73051	1.09735	0.958335	0.90751	0.881425	0.878018	0.859413	0.864853
Release latencies, 4 syt (ms)	169.345	83.8308	44.873	25.9642	18.1091	9.8907	6.5881	4.01621	2.84815	2.24331	1.90605	1.62773	1.43658	1.29798	0.842848	0.728587	0.683787	0.674718	0.660638	0.643953	0.637216
Release latencies, 5 syt (ms)	120.684	56.912	30.2455	18.4	12.5339	7.33116	5.16046	3.1645	2.30781	1.86744	1.56939	1.35357	1.22629	1.10419	0.721224	0.624979	0.589858	0.569404	0.558315	0.547476	0.551948
Release latencies, 6 syt (ms)	92.2258	42.0093	22.6755	14.1158	10.1526	6.11598	4.41221	2.7226	2.02657	1.65531	1.38079	1.20747	1.09211	1.00377	0.658152	0.56925	0.536528	0.517236	0.50897	0.504159	0.500491
Release latencies, 7 syt (ms)	72.1645	33.3389	18.2592	12.0836	8.68045	5.27949	3.83228	2.42697	1.83796	1.49305	1.23625	1.10919	0.999222	0.917521	0.611115	0.532148	0.506209	0.483128	0.474082	0.469447	0.465419
Release latencies, 8 syt (ms)	58.4555	27.7748	15.5589	9.88614	7.433	4.78626	3.41085	2.26783	1.6717	1.37062	1.16691	1.033	0.935138	0.854236	0.582651	0.51166	0.483195	0.468082	0.458353	0.451946	0.448053
Release latencies, 9 syt (ms)	50.8019	23.2492	13.3193	9.04678	6.67541	4.32561	3.19101	2.10775	1.58156	1.29593	1.10637	0.980593	0.888907	0.820391	0.564367	0.497207	0.468107	0.454647	0.446782	0.43996	0.435312
Release latencies, 10 syt (ms)	43.1861	20.8483	12.2095	8.37359	6.20109	4.02706	2.94929	1.94691	1.49603	1.2289	1.05766	0.935242	0.857205	0.791752	0.549256	0.487444	0.458547	0.445368	0.435154	0.433194	0.427311
Release latencies, 11 syt (ms)	39.5464	18.5624	11.2303	7.64113	5.6554	3.81645	2.83653	1.8717	1.42295	1.1787	1.00751	0.907183	0.82169	0.763719	0.539939	0.475207	0.453055	0.438766	0.430177	0.424706	0.421839
Release latencies, 12 syt (ms)	34.0346	17.2153	10.2288	6.84617	5.3871	3.58301	2.68178	1.8094	1.38085	1.13496	0.981527	0.874795	0.804681	0.74744	0.52583	0.471392	0.444668	0.432641	0.425649	0.41926	0.416411
Release latencies, 13 syt (ms)	31.117	15.476	9.43694	6.71614	5.15715	3.41179	2.56552	1.71483	1.32954	1.10444	0.955501	0.850635	0.785383	0.724052	0.517969	0.465425	0.440472	0.42878	0.421364	0.415778	0.412535
Release latencies, 14 syt (ms)	29.825	14.5882	9.15492	6.36131	4.83576	3.32814	2.47539	1.66065	1.28877	1.07074	0.931787	0.832873	0.762943	0.710646	0.511661	0.460199	0.437123	0.425833	0.418047	0.413313	0.411703
Release latencies, 15 syt (ms)	27.1919	13.8592	8.52592	6.12279	4.65635	3.18721	2.41331	1.59983	1.24592	1.03904	0.909034	0.823135	0.752828	0.699073	0.506274	0.455611	0.433916	0.422299	0.416303	0.411013	0.407747
Peak release rates
Calcium (µM)	0.01	0.1	0.2	0.3	0.4	0.5	0.6	0.7	0.8	0.9	1	1.25	1.5	1.75	2	2.5	3	4	5	6	7	8	9	10	20	30	40	50	60	70	80
Peak release rates, 1 syt (SVs/ms)	0.0016948	0.00174951	0.00183341	0.00193057	0.0021409	0.00240638	0.00271314	0.00307828	0.0034172	0.00396774	0.00443744	0.00612138	0.00780538	0.0104255	0.0128161	0.0181956	0.0254443	0.0395029	0.0542358	0.0716298	0.086567	0.10141	0.114862	0.123024	0.180439	0.199419	0.206421	0.217001	0.223237	0.212365	0.215082
Peak release rates, 2 syt (SVs/ms)	0.00169094	0.00178211	0.00185258	0.00223618	0.00267762	0.00327433	0.00411515	0.00519082	0.00643754	0.00793237	0.0101412	0.0175012	0.0282725	0.0454911	0.0684579	0.140394	0.256693	0.620566	1.23287	2.0583	3.13033	4.29208	5.49378	6.87761	16.3541	20.8587	22.5107	22.8307	23.6459	24.5598	24.4866
Peak release rates, 3 syt (SVs/ms)	0.00170303	0.00176173	0.00205971	0.00244375	0.0032048	0.00429449	0.00572699	0.00764263	0.0105735	0.0140582	0.0183944	0.0374068	0.0680828	0.116653	0.200769	0.485912	1.03872	3.34837	8.0572	15.4688	26.0141	40.6096	55.5092	71.1072	208.018	261.81	291.651	302.213	313.279	313.801	323.46
Peak release rates, 4 syt (SVs/ms)	0.00167379	0.00177784	0.00208797	0.00264459	0.00375295	0.00527687	0.00762752	0.0105243	0.0153992	0.0218326	0.0300871	0.0645469	0.129228	0.232696	0.421552	1.07115	2.39259	7.85406	18.4895	35.8046	58.0145	84.6442	113.462	144.254	369.891	453.797	498.062	511.219	525.633	498.545	525.779
Peak release rates, 5 syt (SVs/ms)	0.00166111	0.001819	0.00221776	0.00304209	0.00422748	0.00630371	0.0096717	0.0141028	0.0212662	0.0297511	0.0438026	0.101432	0.201762	0.38668	0.673403	1.85053	4.19363	14.4957	32.6804	61.1478	93.5246	133.676	171.727	211.497	504.189	596.596	645.848	674.146	704.083	694.728	705.805
Peak release rates, 6 syt (SVs/ms)	0.00167218	0.00182909	0.00231228	0.00321412	0.00479231	0.00751114	0.0118333	0.0173245	0.0269772	0.039573	0.0577804	0.138194	0.305732	0.57611	1.06467	2.7447	6.23367	21.0099	46.0234	85.0864	128.958	178.169	230.476	286.239	610.392	731.371	786.565	805.557	828.986	857.517	825.569
Peak release rates, 7 syt (SVs/ms)	0.00171704	0.00186448	0.00239996	0.00353473	0.00536118	0.00868218	0.0139389	0.0218074	0.0339734	0.0514341	0.0755855	0.182464	0.396337	0.803465	1.44198	3.88821	8.61022	27.8376	62.1149	109.157	165.746	229.416	290.905	348.408	729.867	852.708	934.481	958.177	944.844	983.263	997.47
Peak release rates, 8 syt (SVs/ms)	0.00173861	0.00190439	0.00250157	0.00365987	0.00613379	0.00971699	0.0161414	0.0261613	0.0403235	0.0610847	0.0936108	0.236207	0.519981	1.02845	1.90861	4.98146	11.5257	34.5254	78.7287	133.618	193.119	260.738	340.545	407.79	803.248	935.469	1006.78	1050.32	1041.08	1083.27	1087.13
Peak release rates, 9 syt (SVs/ms)	0.00167783	0.00189152	0.00255903	0.00410857	0.00644765	0.0108707	0.0184023	0.0300827	0.0485016	0.0733593	0.108058	0.292787	0.629359	1.27489	2.377	6.46206	13.8942	42.0671	89.926	153.663	222.594	296.612	377.06	465.228	907.963	1087.41	1130.4	1166.2	1204.09	1186.48	1191.33
Peak release rates, 10 syt (SVs/ms)	0.00165628	0.00198384	0.00256383	0.00416865	0.00708121	0.0124677	0.0204257	0.0347255	0.0564346	0.0868169	0.133668	0.337917	0.775044	1.5642	2.84023	7.6263	16.463	50.5399	104.069	172.278	252.415	345.013	423.61	502.886	1012.29	1154.2	1227.33	1258.5	1244.61	1271.88	1288.36
Peak release rates, 11 syt (SVs/ms)	0.00169777	0.00189976	0.00263981	0.00451809	0.00746905	0.0134596	0.0225076	0.0387112	0.0636042	0.101791	0.157906	0.401741	0.883195	1.88063	3.3198	9.16697	19.2486	55.9316	117.448	193.431	277.403	370.075	464.738	558.739	1070.94	1206.11	1297.2	1325.05	1351.86	1376.03	1345.28
Peak release rates, 12 syt (SVs/ms)	0.00170517	0.00189545	0.00275799	0.00450158	0.00813103	0.014295	0.0252888	0.0430333	0.0716382	0.112182	0.171337	0.44767	1.00559	2.10342	3.81929	10.1405	22.1468	64.7287	130.918	215.244	317.228	408.754	512.993	591.039	1147.31	1290.2	1392.67	1406.33	1427.81	1397.2	1453.75
Peak release rates, 13 syt (SVs/ms)	0.00168704	0.00196384	0.00282112	0.00483508	0.00869256	0.0156321	0.0282008	0.0481708	0.078886	0.124491	0.190058	0.508203	1.14922	2.37111	4.32766	11.9025	23.9622	70.5838	139.235	232.429	330.891	438.252	538.553	642.285	1235.79	1423.32	1439.95	1419.15	1495.94	1501.66	1473.65
Peak release rates, 14 syt (SVs/ms)	0.00168372	0.00196363	0.00281763	0.0049481	0.00922583	0.01634	0.0296748	0.0514983	0.0864728	0.137122	0.215494	0.567794	1.31689	2.67592	4.95276	13.0154	26.3612	75.7211	156.224	249.64	361.842	451.425	558.779	665.505	1292.39	1418.68	1501.43	1562.46	1516.81	1573.43	1567.78
Peak release rates, 15 syt (SVs/ms)	0.00171156	0.00194479	0.00294536	0.0051179	0.00974762	0.0176661	0.0331673	0.0552375	0.092937	0.148278	0.236261	0.630129	1.45903	2.95596	5.28424	14.0628	30.2481	84.4695	164.276	263.345	366.679	491.381	599.865	710.127	1312.72	1447.47	1558.02	1611.52	1573.53	1655.98	1592.34
Panel E
Sum of sd (nA)
Reaction only	53.6875
Reactions & syts	53.8614
Reactions & RRP	288.243

## Sheet: Figure 5 - figure supplement 1
Figure 5 - figure supplement 1
First fusion times, sorted (ms)
[Ca2+] = 1 µM
Stochastic sim. using analytical solution	0.360442	0.383163	0.538974	0.618575	0.68624	0.726801	0.796622	0.814193	0.84283	0.84767	0.882231	1.07647	1.19472	1.22441	1.22461	1.22954	1.25424	1.2825	1.31966	1.3286	1.34557	1.37994	1.40134	1.41281	1.43264	1.50635	1.60217	1.63359	1.6346	1.64619	1.65202	1.65525	1.72891	1.73375	1.73952	1.81522	1.82179	1.84733	1.85174	1.88584	1.89673	1.9246	1.92989	1.9493	1.96248	1.97854	1.98673	2.00308	2.0091
Stochastic sim. using Gillespie algorithm	0.461633	0.646357	0.85254	0.931311	0.932753	0.994106	1.1122	1.17641	1.21759	1.24504	1.26802	1.27387	1.2838	1.31262	1.35094	1.40868	1.43678	1.51224	1.53984	1.5515	1.55253	1.58608	1.6223	1.67404	1.68334	1.70046	1.70518	1.70726	1.79356	1.79951	1.80733	1.81584	1.83167	1.91317	1.94218	1.9928	2.00158	2.00421	2.00652	2.01131	2.01682	2.03254	2.04762	2.06947	2.09528	2.0969	2.10261	2.11092	2.12726
[Ca2+] = 5 µM
Stochastic sim. using analytical solution	0.0601619	0.0729635	0.0752169	0.0952612	0.0963406	0.10504	0.110383	0.112192	0.11294	0.119539	0.119642	0.123362	0.125683	0.127596	0.128324	0.128532	0.145607	0.154052	0.15446	0.156826	0.157325	0.162019	0.16979	0.171461	0.173534	0.177275	0.178068	0.179962	0.179992	0.180626	0.180746	0.181633	0.182134	0.183121	0.184158	0.184423	0.184446	0.18514	0.187758	0.188477	0.190401	0.191951	0.193614	0.194376	0.195371	0.197549	0.197908	0.199487	0.201319
Stochastic sim. using Gillespie algorithm	0.0653704	0.0679319	0.0773055	0.0787927	0.0828213	0.0923996	0.102227	0.107119	0.115663	0.123046	0.132875	0.137756	0.142222	0.143373	0.143462	0.143792	0.144249	0.144672	0.145995	0.147254	0.148183	0.153607	0.16051	0.164343	0.174226	0.174753	0.177187	0.179461	0.180105	0.180254	0.181842	0.18387	0.184477	0.184607	0.186745	0.189242	0.190326	0.193871	0.198045	0.198706	0.198715	0.200931	0.202827	0.206709	0.208936	0.209201	0.211671	0.214284	0.22119
[Ca2+] = 50 µM
Stochastic sim. using analytical solution	4.04e-05	0.000124885	0.000133293	0.000238507	0.000448052	0.000543082	0.000629784	0.000663339	0.000699785	0.000774139	0.000930758	0.000952718	0.00104143	0.00108901	0.00111617	0.00119959	0.00129967	0.00139526	0.00149158	0.00165237	0.0016916	0.0018063	0.00228935	0.0025904	0.00266685	0.00335411	0.00343246	0.00374329	0.00392152	0.00395366	0.00399071	0.00413481	0.00429037	0.00436139	0.00439277	0.00445762	0.00484149	0.00497038	0.005051	0.00506784	0.00516253	0.00528161	0.00531129	0.00532499	0.00543959	0.00637208	0.00645989	0.00646639	0.00651298
Stochastic sim. using Gillespie algorithm	0.00170968	0.00384031	0.00390613	0.00393137	0.00393307	0.00417808	0.00419002	0.00468144	0.00468188	0.00512353	0.00538925	0.00554063	0.00579065	0.00580098	0.00583919	0.00590747	0.00590902	0.00592468	0.00597466	0.00597937	0.00599451	0.0060724	0.0061157	0.00628592	0.00639635	0.00644709	0.00648399	0.00663858	0.00689219	0.00706879	0.00711465	0.00720128	0.00727633	0.00743484	0.0075278	0.00759805	0.00760339	0.00776003	0.00780338	0.00783718	0.00790237	0.00791451	0.00799209	0.00808027	0.00809637	0.00813764	0.00820566	0.00822309	0.0082257
Second fusiontimes, sorted (ms)
[Ca2+] = 1 µM
Stochastic sim. using analytical solution	1.72519	1.81359	2.13892	2.14367	2.47665	2.63569	2.64751	2.68049	2.87198	3.09065	3.22739	3.38246	3.39473	3.4193	3.4935	3.72385	3.78538	3.86547	3.89221	3.9309	3.93423	3.98472	3.99474	4.11283	4.14918	4.16462	4.18487	4.20296	4.28326	4.286	4.31912	4.3279	4.33944	4.35009	4.37846	4.4017	4.40617	4.41597	4.42164	4.49516	4.61551	4.639	4.77726	4.80324	4.80569	4.83157	4.90783	4.97864	5.05158
Stochastic sim. using Gillespie algorithm	2.23586	2.66695	2.77607	2.86825	2.86906	2.93296	2.99498	3.03106	3.22661	3.25494	3.26198	3.28165	3.2889	3.32996	3.35725	3.54357	3.57886	3.59566	3.76916	3.7939	3.86516	3.9347	4.00184	4.24922	4.36688	4.38404	4.41256	4.42027	4.42217	4.44075	4.58913	4.59107	4.59725	4.63252	4.66708	4.70536	4.75426	4.75787	4.76835	4.80166	4.8245	4.87837	4.89482	4.96919	4.9991	5.00006	5.03892	5.06589	5.08756
[Ca2+] = 5 µM
Stochastic sim. using analytical solution	0.203385	0.228641	0.248081	0.256685	0.266035	0.266678	0.267097	0.267225	0.285736	0.292321	0.305603	0.305809	0.312176	0.313611	0.314208	0.323757	0.325924	0.33494	0.335091	0.335854	0.336359	0.336763	0.339782	0.340011	0.340045	0.340766	0.344852	0.347917	0.351107	0.35645	0.360067	0.360163	0.360604	0.361202	0.363487	0.365722	0.365798	0.36622	0.370803	0.373136	0.373167	0.373371	0.374276	0.374408	0.375304	0.375346	0.377368	0.378136	0.378539
Stochastic sim. using Gillespie algorithm	0.202859	0.220766	0.231437	0.231871	0.236974	0.255838	0.277164	0.281862	0.287185	0.287272	0.287292	0.288783	0.29523	0.29676	0.299517	0.302267	0.303777	0.303956	0.304175	0.305006	0.314175	0.318732	0.320633	0.323865	0.326267	0.327518	0.329338	0.329501	0.332754	0.33556	0.33824	0.339335	0.342608	0.343447	0.345669	0.346034	0.347184	0.347486	0.347685	0.349352	0.354437	0.355495	0.356327	0.359082	0.359171	0.359513	0.361061	0.365188	0.365808
[Ca2+] = 50 µM
Stochastic sim. using analytical solution	0.00836458	0.00887246	0.0101321	0.0103841	0.0104063	0.0105236	0.0105896	0.010637	0.010722	0.0107514	0.0107537	0.011123	0.0111417	0.0112082	0.0112801	0.0113181	0.0113651	0.0113961	0.0113979	0.0114093	0.0116151	0.0116485	0.0118031	0.0118607	0.0119017	0.0120741	0.0121174	0.0121539	0.0122473	0.0123157	0.0124261	0.0125374	0.0126217	0.0126366	0.0126505	0.0128215	0.0129637	0.0129961	0.0130134	0.0130607	0.013103	0.0131038	0.0132056	0.0132057	0.0132261	0.0134685	0.0134923	0.0135851	0.0136531
Stochastic sim. using Gillespie algorithm	0.00795182	0.00818391	0.00909751	0.0092092	0.0096752	0.0104497	0.0104881	0.010774	0.0109762	0.0116232	0.0118187	0.0118664	0.0120859	0.0121401	0.0122978	0.0124534	0.0126293	0.0129725	0.0129816	0.0130635	0.0131532	0.0132464	0.0132791	0.0135052	0.013853	0.0139081	0.0139916	0.0140815	0.0141271	0.0141385	0.0142125	0.014241	0.0143034	0.014697	0.0146997	0.0147813	0.0148222	0.0148576	0.0148599	0.0149058	0.0149181	0.0149883	0.0150289	0.0150301	0.0150388	0.0150679	0.0151629	0.0151756	0.0152762
Third fusiontimes, sorted (ms)
[Ca2+] = 1 µM
Stochastic sim. using analytical solution	2.73197	3.21298	3.42945	3.83008	4.26984	4.36339	4.76565	5.11594	5.1933	5.33996	5.42216	5.69455	5.85333	5.99618	6.08587	6.08693	6.13769	6.34514	6.67751	6.69326	6.74105	6.81985	6.85436	6.85556	6.8942	6.90918	6.99865	7.00808	7.04689	7.21707	7.23639	7.24648	7.31579	7.35137	7.37888	7.38744	7.40861	7.4541	7.49399	7.53272	7.5861	7.63526	7.66607	7.67878	7.71706	7.75375	7.80268	7.92494	7.98385
Stochastic sim. using Gillespie algorithm	3.73745	3.87802	4.04012	4.43953	4.51763	4.65037	5.17545	5.57295	5.72127	5.74059	5.77447	5.88701	5.98733	6.03301	6.09192	6.14235	6.15117	6.23435	6.24126	6.25931	6.29144	6.36874	6.36919	6.38105	6.45963	6.52789	6.7048	6.71241	6.89048	6.96873	6.98072	6.98433	6.99045	7.01668	7.01872	7.03202	7.10175	7.13854	7.1645	7.28793	7.29503	7.31864	7.34894	7.40055	7.42219	7.47162	7.49968	7.52652	7.58611
[Ca2+] = 5 µM
Stochastic sim. using analytical solution	0.304191	0.353281	0.367456	0.392167	0.395917	0.396555	0.400345	0.402462	0.403484	0.407996	0.411184	0.418855	0.426216	0.432315	0.433682	0.43784	0.441506	0.448679	0.44923	0.44946	0.449744	0.450625	0.450643	0.451475	0.452276	0.455188	0.455664	0.455783	0.457704	0.458479	0.459432	0.463216	0.465634	0.470601	0.470744	0.473099	0.4756	0.477885	0.478189	0.480481	0.481264	0.483791	0.484063	0.484404	0.485268	0.485517	0.48983	0.490326	0.490981
Stochastic sim. using Gillespie algorithm	0.33221	0.340566	0.367051	0.371145	0.379345	0.380681	0.394655	0.396186	0.405074	0.409938	0.412719	0.416853	0.419622	0.419701	0.426611	0.427069	0.433332	0.43518	0.436481	0.43868	0.439623	0.4491	0.449207	0.450906	0.451446	0.451709	0.451775	0.452598	0.453447	0.454158	0.454372	0.454442	0.455574	0.456913	0.460459	0.465326	0.466678	0.468208	0.471445	0.47148	0.475251	0.475277	0.475525	0.476368	0.482949	0.486225	0.486591	0.487173	0.487357
[Ca2+] = 50 µM
Stochastic sim. using analytical solution	0.00854259	0.011444	0.0129826	0.0131822	0.0132629	0.0136077	0.0137426	0.0142636	0.0143164	0.0145338	0.0147963	0.0148717	0.0148942	0.0150046	0.0151466	0.0154064	0.0154708	0.0155571	0.0161884	0.0163633	0.016586	0.0166048	0.016652	0.0170552	0.0170907	0.0171649	0.0172891	0.0177722	0.0178121	0.0178242	0.0179507	0.0181308	0.0181572	0.0182702	0.0183207	0.0185343	0.0187141	0.0187399	0.0187712	0.0187756	0.0189029	0.0189749	0.019049	0.0196183	0.0198881	0.0200795	0.0202089	0.0202837	0.0203022
Stochastic sim. using Gillespie algorithm	0.0128758	0.01401	0.0146988	0.0152568	0.0153359	0.0157449	0.0162665	0.0163198	0.0164296	0.0164376	0.0165119	0.0165292	0.0165791	0.0169827	0.0172583	0.0172959	0.0173993	0.017457	0.0175713	0.0178181	0.0179299	0.0181122	0.0181666	0.0181865	0.0181932	0.0184266	0.0184276	0.0184843	0.0185133	0.0186703	0.0187098	0.0187958	0.0188634	0.0192173	0.0192606	0.0192764	0.0194008	0.0194029	0.0195025	0.0195049	0.019612	0.0196642	0.0197504	0.0198232	0.0198407	0.0198811	0.019888	0.0199301	0.0200603
Fourth fusiontimes, sorted (ms)
[Ca2+] = 1 µM
Stochastic sim. using analytical solution	3.48381	5.60365	6.7162	6.8507	7.42345	7.69212	7.73922	7.88823	7.92076	8.09676	8.22221	8.25546	8.45116	8.50495	8.58949	8.60392	8.66177	8.67164	8.70714	8.70947	8.8227	8.82824	8.83075	8.98967	9.01499	9.17669	9.25255	9.31787	9.3632	9.47493	9.72494	9.77438	9.77927	9.79121	9.81473	9.87191	9.90711	9.91431	9.93514	9.96271	10.0052	10.0645	10.0718	10.1522	10.1769	10.1875	10.203	10.2257	10.2887
Stochastic sim. using Gillespie algorithm	5.77633	6.03517	6.04734	6.88236	7.48223	7.53887	7.58725	7.68907	7.72587	7.99153	7.99828	8.09353	8.12422	8.15117	8.3707	8.41036	8.41208	8.48713	8.49664	8.65059	8.67192	8.79279	8.95575	8.97805	8.98621	9.15115	9.20642	9.21192	9.22169	9.35761	9.48626	9.5147	9.60103	9.70109	9.82407	9.8264	9.83836	9.96201	9.9622	9.97308	10.0903	10.0997	10.1405	10.1526	10.254	10.4208	10.4543	10.4582	10.4639
[Ca2+] = 5 µM
Stochastic sim. using analytical solution	0.348374	0.433252	0.436992	0.469317	0.47889	0.480499	0.488135	0.500042	0.50317	0.50341	0.507924	0.511237	0.512355	0.514089	0.516348	0.518084	0.518546	0.521167	0.523253	0.52415	0.525286	0.527339	0.532202	0.532652	0.533268	0.535095	0.53603	0.536262	0.536649	0.536969	0.537487	0.537919	0.540374	0.544084	0.546183	0.54735	0.549075	0.54948	0.555015	0.555247	0.560536	0.561991	0.56222	0.564544	0.564962	0.568101	0.569008	0.57277	0.573469
Stochastic sim. using Gillespie algorithm	0.426048	0.428037	0.43698	0.442714	0.463942	0.467446	0.468443	0.473069	0.480545	0.482949	0.488412	0.490248	0.491967	0.493672	0.499156	0.501362	0.501667	0.504111	0.511869	0.51424	0.514466	0.514679	0.517721	0.521346	0.521526	0.521858	0.52364	0.530894	0.532103	0.532334	0.532923	0.538891	0.539413	0.540761	0.540905	0.543636	0.544762	0.54586	0.547504	0.549973	0.550273	0.555276	0.555317	0.556655	0.557049	0.557367	0.558861	0.558947	0.564288
[Ca2+] = 50 µM
Stochastic sim. using analytical solution	0.016083	0.0163533	0.0172168	0.0191821	0.019752	0.0197554	0.0200374	0.0203543	0.0203964	0.0204045	0.0205772	0.0206452	0.020777	0.0214426	0.0215636	0.0216147	0.0217352	0.0218138	0.0219602	0.0219631	0.0220969	0.0221766	0.0221915	0.0222267	0.0222828	0.0222963	0.0223777	0.0223992	0.0226425	0.0226653	0.0228213	0.0229022	0.0229515	0.0230419	0.0231349	0.0231577	0.023183	0.0232527	0.0232942	0.023306	0.0233342	0.0234225	0.0235289	0.0235396	0.0236528	0.0237104	0.0237205	0.0239038	0.02391
Stochastic sim. using Gillespie algorithm	0.0156521	0.0171373	0.0179346	0.0185095	0.0186132	0.0187436	0.0194097	0.0196277	0.0197079	0.0198023	0.0201803	0.0205251	0.020549	0.0206176	0.0208251	0.0210092	0.0211114	0.0211394	0.0211437	0.0211905	0.0211959	0.0213667	0.0216832	0.0216977	0.0217552	0.0218208	0.0218663	0.0223078	0.0223182	0.0223882	0.0224266	0.0224666	0.0224845	0.0224905	0.0226457	0.0226925	0.0228215	0.0229913	0.023096	0.0231332	0.0232193	0.0235653	0.0235894	0.0237304	0.0238218	0.023845	0.0238734	0.0239212	0.0239614
Fifth fusiontimes, sorted (ms)
[Ca2+] = 1 µM
Stochastic sim. using analytical solution	7.00306	8.38365	8.53334	8.70348	10.3067	10.4102	10.7122	10.9053	10.9255	11.0991	11.2576	11.3814	11.511	11.5162	11.5264	11.704	11.7197	11.7309	11.731	11.8315	11.9351	12.0473	12.3258	12.4219	12.4869	12.5288	12.5726	12.5936	12.618	12.6219	12.6291	12.7862	12.7943	12.8232	12.855	12.9756	12.9943	13.0156	13.06	13.0683	13.0896	13.1027	13.1221	13.1703	13.2041	13.2062	13.219	13.3021	13.3127
Stochastic sim. using Gillespie algorithm	5.94013	8.35182	8.67967	9.36634	9.39034	9.58898	9.67455	9.9763	9.98774	10.0531	10.104	10.2035	10.2239	10.2917	10.4271	10.8966	11.1337	11.3119	11.3954	11.4855	11.4932	11.5023	11.5438	11.6125	11.6373	11.6644	11.7435	11.8178	11.8302	11.9582	11.991	12.1344	12.241	12.2435	12.3425	12.3824	12.4194	12.6406	12.6689	12.7621	12.8441	12.9329	12.9906	13.0078	13.0209	13.0266	13.1013	13.1354	13.1747
[Ca2+] = 5 µM
Stochastic sim. using analytical solution	0.393113	0.478332	0.508945	0.545541	0.545681	0.558575	0.56076	0.574781	0.575811	0.580298	0.585057	0.58528	0.586526	0.587188	0.589676	0.591969	0.593205	0.595626	0.596101	0.59981	0.600754	0.602199	0.604724	0.605229	0.605235	0.611115	0.611132	0.612492	0.612793	0.613959	0.61399	0.617302	0.618426	0.619503	0.620037	0.621746	0.627148	0.628259	0.630544	0.631208	0.637344	0.638508	0.638533	0.639642	0.640787	0.643144	0.645868	0.645935	0.646839
Stochastic sim. using Gillespie algorithm	0.482226	0.482507	0.491663	0.504144	0.50808	0.532397	0.535426	0.540818	0.546965	0.5477	0.556699	0.559783	0.564522	0.569494	0.569934	0.570115	0.575682	0.575758	0.577039	0.57723	0.580579	0.583696	0.58757	0.589458	0.589704	0.590869	0.594174	0.595504	0.598171	0.598262	0.600843	0.605307	0.609602	0.609621	0.611191	0.614253	0.618967	0.619897	0.620306	0.621657	0.6235	0.623624	0.623746	0.631211	0.634515	0.634962	0.637828	0.637857	0.637956
[Ca2+] = 50 µM
Stochastic sim. using analytical solution	0.0171873	0.0200375	0.0212821	0.0215674	0.022353	0.0225029	0.0231489	0.0234038	0.0235182	0.0236256	0.0236545	0.0238067	0.0240405	0.0243066	0.0248474	0.0249447	0.0249888	0.0251961	0.0253492	0.0253904	0.0253917	0.0254555	0.0255046	0.0256977	0.0258007	0.0262264	0.0262987	0.026339	0.0263916	0.026425	0.0264389	0.0264433	0.026444	0.0265592	0.0265773	0.0266296	0.0267261	0.0268528	0.0268869	0.0269275	0.0270341	0.0271418	0.0272582	0.0272847	0.0273527	0.0273996	0.0274791	0.0275662	0.0275828
Stochastic sim. using Gillespie algorithm	0.016492	0.0203431	0.0210849	0.0216684	0.0217415	0.0226297	0.0227075	0.0227199	0.0227287	0.0234325	0.0235868	0.0236254	0.0236768	0.0240155	0.0240766	0.0240924	0.0242679	0.0243953	0.0244415	0.0244518	0.0246148	0.024771	0.024892	0.0249274	0.0249718	0.0250128	0.025037	0.0251969	0.0253593	0.0254097	0.0255369	0.0255894	0.0256021	0.0259421	0.0260647	0.0261201	0.0261676	0.0261924	0.0262928	0.0263182	0.0263733	0.0264739	0.0264958	0.0266136	0.0267664	0.0269154	0.0269315	0.0269361	0.026991
[truncated: 951 more columns]

## Sheet: Figure 5 figure suppelemt 2
Figure 5 - figure supplement 2
Panel A
Release latencies
Calcium (µM)	1	1.25	1.5	1.75	2	2.5	3	4	5	6	7	8	9	10	20	30	40	50	60	70	80
Release latencies, 15 syts (ms)	27.1919	13.8592	8.52592	6.12279	4.65635	3.18721	2.41331	1.59983	1.24592	1.03904	0.909034	0.823135	0.752828	0.699073	0.506274	0.455611	0.433916	0.422299	0.416303	0.411013	0.407747
Release latencies, 3 syts (ms)	279.926	144.883	80.4447	47.4021	30.9976	15.4982	10.0145	5.22432	3.55544	2.65815	2.14896	1.77671	1.53564	1.35023	0.717075	0.578057	0.527232	0.501148	0.497741	0.479135	0.484576
Release latencies, 3 syts refit PIP2 (ms)	25.4688	13.0363	8.13238	5.82418	4.55456	3.06756	2.36055	1.6216	1.24053	1.03978	0.902928	0.812631	0.75365	0.698851	0.505418	0.456524	0.434489	0.422778	0.414907	0.411571	0.407024
Peak release rates
Calcium (µM)	0.01	0.1	0.2	0.3	0.4	0.5	0.6	0.7	0.8	0.9	1	1.25	1.5	1.75	2	2.5	3	4	5	6	7	8	9	10	20	30	40	50	60	70	80
Peak release rates, 15 syts (SVs/ms)	0.00171156	0.00194479	0.00294536	0.0051179	0.00974762	0.0176661	0.0331673	0.0552375	0.092937	0.148278	0.236261	0.630129	1.45903	2.95596	5.28424	14.0628	30.2481	84.4695	164.276	263.345	366.679	491.381	599.865	710.127	1312.72	1447.47	1558.02	1611.52	1573.53	1655.98	1592.34
Peak release rates, 3 syts (SVs/ms)	0.00170303	0.00176173	0.00205971	0.00244375	0.0032048	0.00429449	0.00572699	0.00764263	0.0105735	0.0140582	0.0183944	0.0374068	0.0680828	0.116653	0.200769	0.485912	1.03872	3.34837	8.0572	15.4688	26.0141	40.6096	55.5092	71.1072	208.018	261.81	291.651	302.213	313.279	313.801	323.46
Peak release rates, 3 syts refit PIP2 (SVs/ms)	0.001707	0.00205586	0.00325239	0.00568251	0.0110651	0.0203369	0.0354426	0.0625956	0.104174	0.16825	0.261621	0.667735	1.48616	3.01502	5.42353	13.8163	28.2693	77.9804	149.74	239.781	353.043	451.086	546.294	661.712	1249.23	1445.53	1474.66	1497.28	1522.53	1534.21	1534.07
Panel C
# Syts	1	2	3	4	5	6	7	8	9	10	11	12	13	14	15
Costs - original	8225.05	3108.23	1223.08	656.404	357.216	178.468	65.1789	-8.93467	-58.1555	-90.8976	-112.397	-126.055	-134.15	-138.247	-139.448
Costs - PIPup	6615.96	960.639	-135.184	-137.395	-138.19	-138.597	-138.842	-139.007	-139.124	-139.212	-139.28	-139.335	-139.38	-139.417	-139.448
Panel D
# Syts	1	2	3	4	5	6	7	8	9	10	11	12	13	14	15
Factor increase PIP2	8.11948e+09	6.29229e+08	9.76716	5.50992	3.88094	3.00394	2.45368	2.07509	1.79793	1.58654	1.41996	1.2849	1.17344	1.07976	0.999994
Panel F
# Syts	1	2	3	4	5	6	7	8	9	10	11	12	13	14	15
Amplitudes (nA) - orignal	-0.00844492	-0.0585519	-0.177727	-0.417636	-0.793904	-1.27439	-1.87436	-2.61376	-3.42912	-4.27669	-5.14368	-6.11219	-7.10129	-8.16535	-9.24187
Amplitudes (nA) - Refitted PIP2	-0.0233133	-0.618123	-9.30713	-9.3056	-9.23615	-9.10814	-9.22906	-9.15465	-9.16138	-9.19122	-9.15645	-9.19584	-9.17246	-9.21335	-9.22246
