# Supplementary material for: Allosteric stabilization of calcium and phosphoinositide dual binding engages several synaptotagmins in fast exocytosis
Source: eLife. 2022 Aug 5;11:e74810. doi: 10.7554/eLife.74810 (PMC9489213; doi:10.7554/eLife.74810)
Supplement: Figure 6—source data 1. [file elife-74810-fig6-data1.xlsx]

## Sheet: Figure 6
Figure 6
Panel D
Top panel, Homozygous expression
#syts	1	2	3	4	5	6	7	8	9	10	11	12	13	14	15
Amplitude WT (nA)	-0.00844492	-0.0585519	-0.177727	-0.417636	-0.793904	-1.27439	-1.87436	-2.61376	-3.42912	-4.27669	-5.14368	-6.11219	-7.10129	-8.16535	-9.24187
Amplitude Ca2+ binding mutant (nA)	-0.0024	-0.0132183	-0.0835043	-0.213884	-0.424544	-0.726129	-1.0596	-1.4768	-1.9319	-2.44859	-2.97479	-3.59961	-4.16253	-4.8141	-5.40911
Amplitude No Ca2+, A-on mutant (nA)	-0.0006	-0.0006	-0.0006	-0.0003	-0.0003	-0.0003	-0.0003	-0.0003	-0.0003	-0.0003	-0.0003	-0.0003	-0.0006	-0.0006	-0.0006
Middle panel, heterozygous expression
#WT syts	15	14	13	12	11	10	9	8	7	6	5	4	3	2	1	0
# mutant syts	0	1	2	3	4	5	6	7	8	9	10	11	12	13	14	15
Amplitude Ca2+ binding mutant (nA)	-9.24187	-8.70139	-8.25083	-7.91944	-7.61219	-7.31669	-7.04002	-6.78707	-6.59617	-6.32002	-6.13169	-6.00025	-5.83831	-5.72103	-5.57698	-5.40911
Amplitude No Ca2+, A-on mutant (nA)	-9.24187	-6.9071	-5.23129	-3.7548	-2.73978	-1.92575	-1.28524	-0.862802	-0.539737	-0.314034	-0.183128	-0.100448	-0.0522937	-0.0212856	-0.00420402	-0.0006

## Sheet: Figure 6 - figure supplement 1
Figure 6 - figure supplement 1
Panel C
	Amplitude A-on (nA)	Amplitude A-off (nA)
Homo	0.0006	0.0006
het	0.862802	1.35972
