# Supplementary material for: Allosteric stabilization of calcium and phosphoinositide dual binding engages several synaptotagmins in fast exocytosis
Source: eLife. 2022 Aug 5;11:e74810. doi: 10.7554/eLife.74810 (PMC9489213; doi:10.7554/eLife.74810)
Supplement: Figure 7—source data 1. [file elife-74810-fig7-data1.xlsx]

## Sheet: Sheet1
Figure 7
Panel C
	Amplitude (nA)	SEM	n
WT	9.2189	0.628537	50
mutant	1.18898	0.0735136	50
Panel D
	PPR	SEM	n
WT	0.988887	0.01343	50
mutant	3.98265	0.0942623	50
