# Supplementary material for: Allosteric stabilization of calcium and phosphoinositide dual binding engages several synaptotagmins in fast exocytosis
Source: eLife journal article supplement (doi:10.7554/elife.74810), 2022-08-05
Supplement: supp [file elife_poa_e74810_Figure_1_figure_supplement_2.pdf › elife_poa_e74810_Figure_1_figure_supplement_2.pdf]

Figure 1 - figure supplement 2

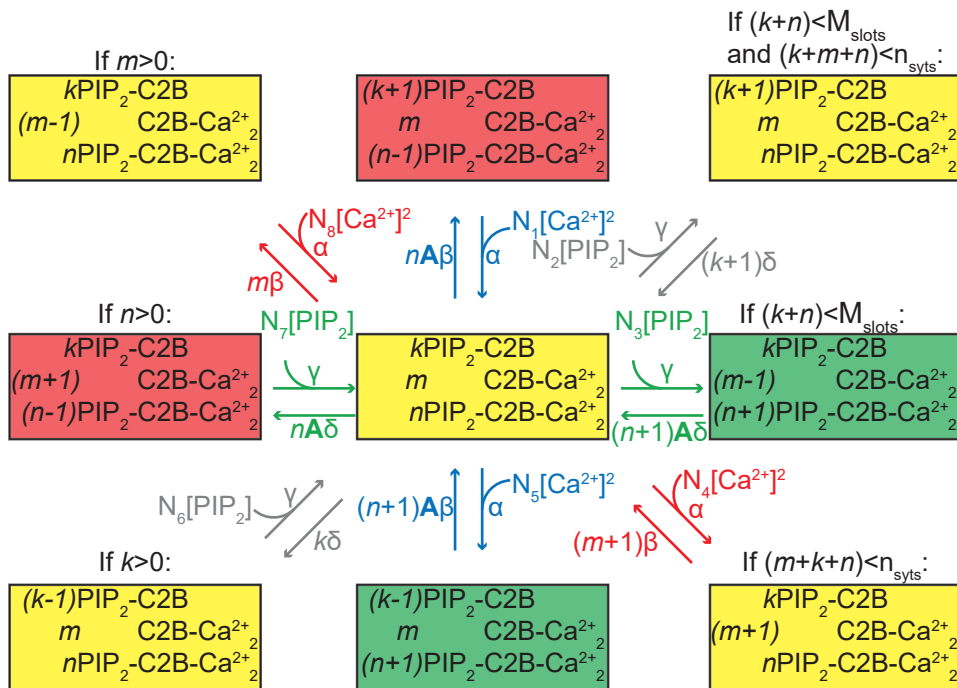

$$N_1 = k+1; N_2 = (n_{\text{syts}} - k - m - n)(M_{\text{slots}} - k - n); N_3 = m(M_{\text{slots}} - k - n); N_4 = (n_{\text{syts}} - k - m - n); N_5 = k;$$

$$N_6 = (n_{\text{syts}} - (k-1) - m - n)(M_{\text{slots}} - (k-1) - n); N_7 = (m+1)(M_{\text{slots}} - k - (n-1)); N_8 = (n_{\text{syts}} - k - (m-1) - n).$$
