# Supplementary material for: Allosteric stabilization of calcium and phosphoinositide dual binding engages several synaptotagmins in fast exocytosis
Source: eLife journal article supplement (doi:10.7554/elife.74810), 2022-08-05

Figure 2 - figure supplement 7

**A**

Varying  $\alpha$

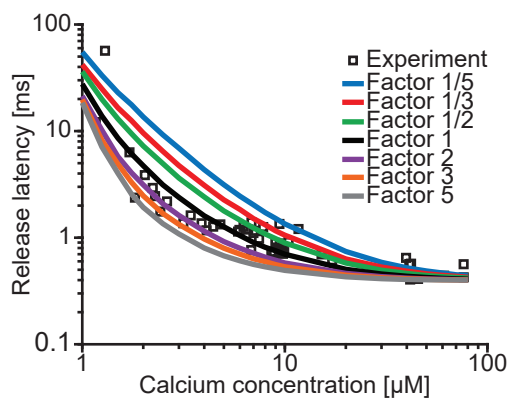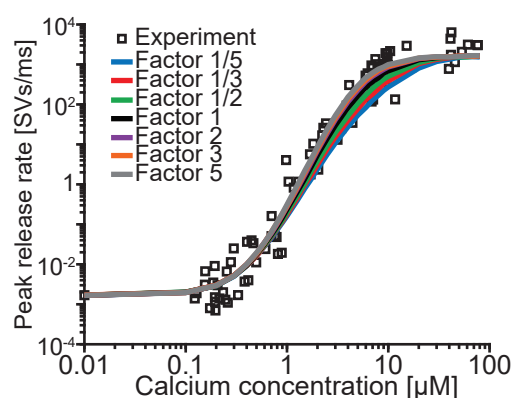

**B**

Varying  $\gamma$

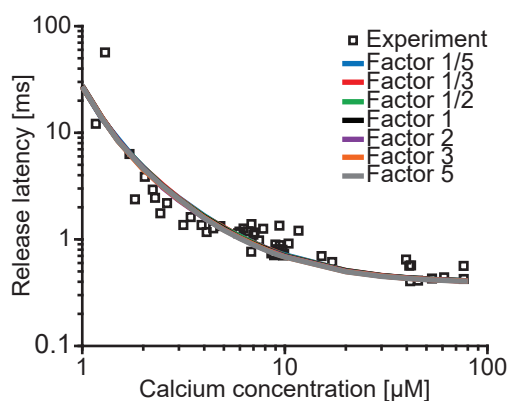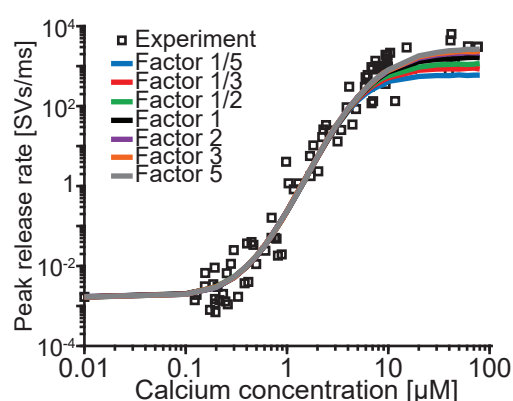

**C**

Varying  $[\text{PIP}_2]$

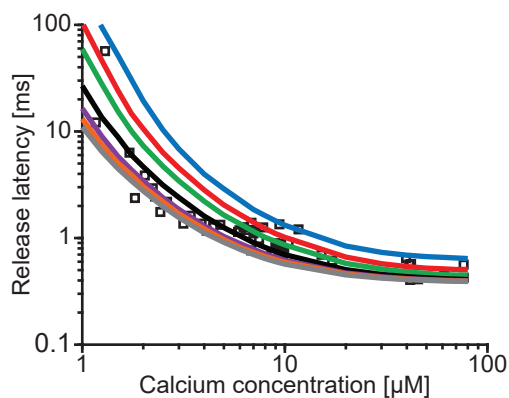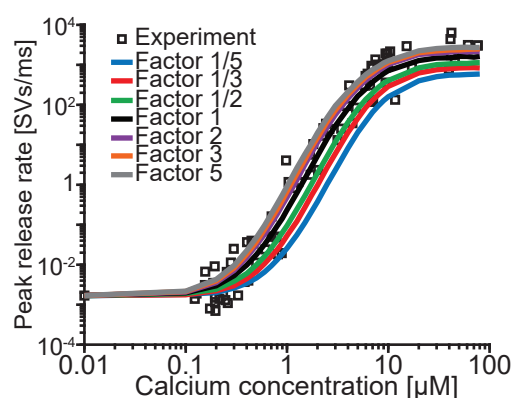

**D**

Varying  $f$

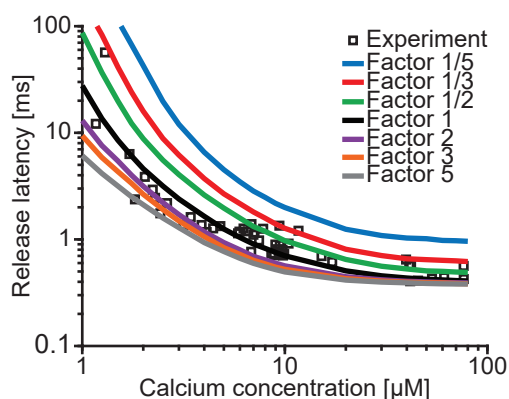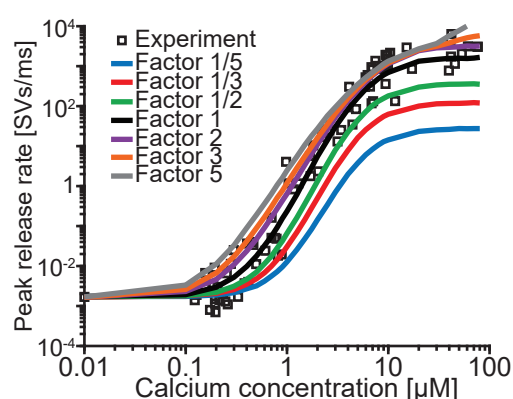

**E**

Varying  $d$

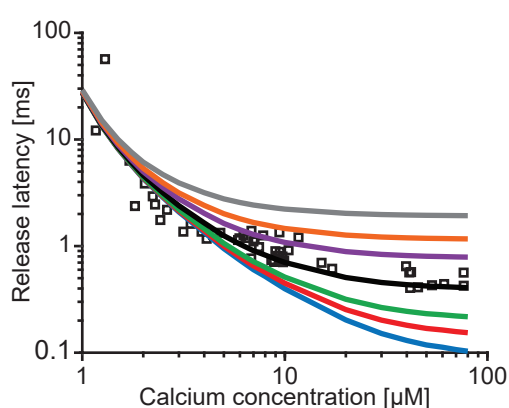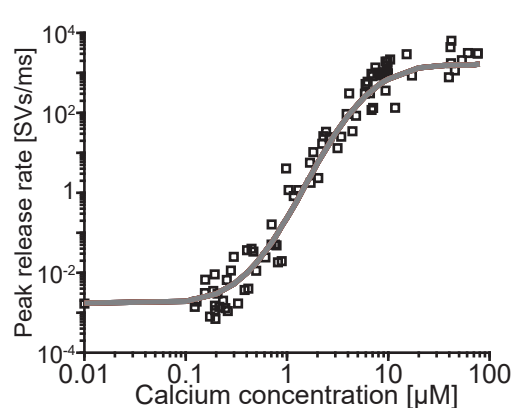

Supplement: supp [file elife_poa_e74810_Figure_2_figure_supplement_7.pdf › elife_poa_e74810_Figure_2_figure_supplement_7.pdf]
