# Supplementary material for: Allosteric stabilization of calcium and phosphoinositide dual binding engages several synaptotagmins in fast exocytosis
Source: eLife journal article supplement (doi:10.7554/elife.74810), 2022-08-05

Figure 6 - figure supplement 1

**A**

No  $\text{Ca}^{2+}$  binding  
A-off mutant

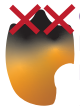

$\alpha^{***} = 0$   
 $K_{D,2\text{Ca}^{2+}}^{***} = K_{D,2\text{Ca}^{2+}}^{\text{wt}}$   
 $K_{D,\text{PIP}_2}^{***} = K_{D,\text{PIP}_2}^{\text{wt}}$   
 $A^{***}$  : Not relevant

**B<sub>1</sub>**

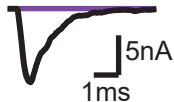

— 15 WT  
— 15 mutant

**B<sub>2</sub>**

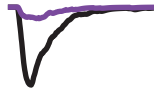

— 15 WT  
— 8 WT + 7 mutant

**C**

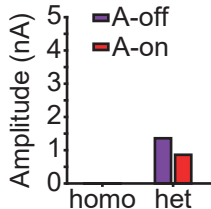

Supplement: supp [file elife_poa_e74810_Figure_6_figure_supplement_1.pdf › elife_poa_e74810_Figure_6_figure_supplement_1.pdf]
