# Supplementary figures and images for: Allosteric stabilization of calcium and phosphoinositide dual binding engages several synaptotagmins in fast exocytosis
Source: eLife journal article supplement (doi:10.7554/elife.74810), 2022-08-05

Figure 1 - figure supplement 1

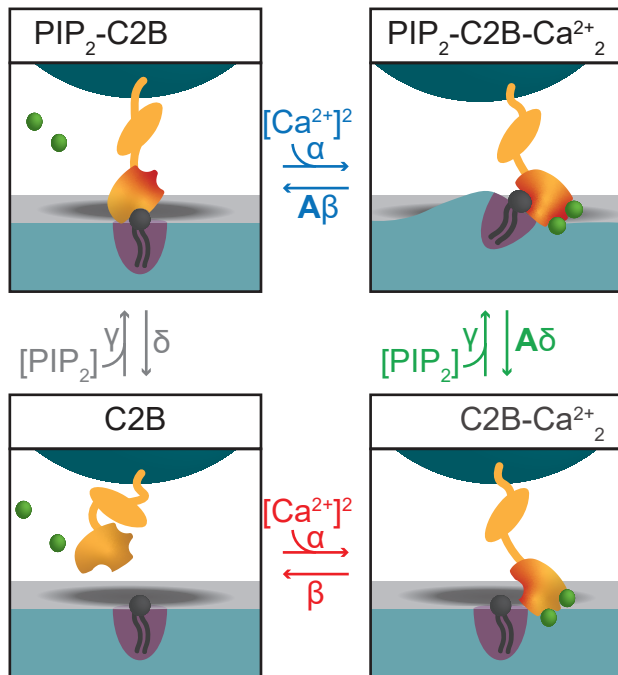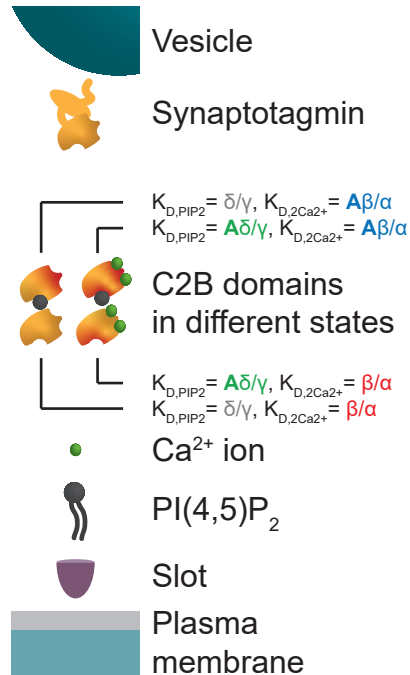

Supplement: supp [file elife_poa_e74810_Figure_1_figure_supplement_1.pdf › elife_poa_e74810_Figure_1_figure_supplement_1.pdf]

Figure 2 - figure supplement 1

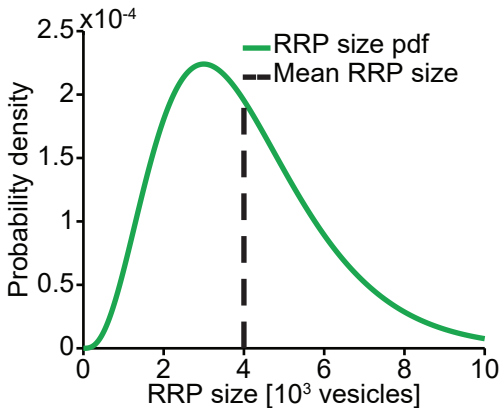

Supplement: supp [file elife_poa_e74810_Figure_2_figure_supplement_1.pdf › elife_poa_e74810_Figure_2_figure_supplement_1.pdf]

Figure 2 - figure supplement 2

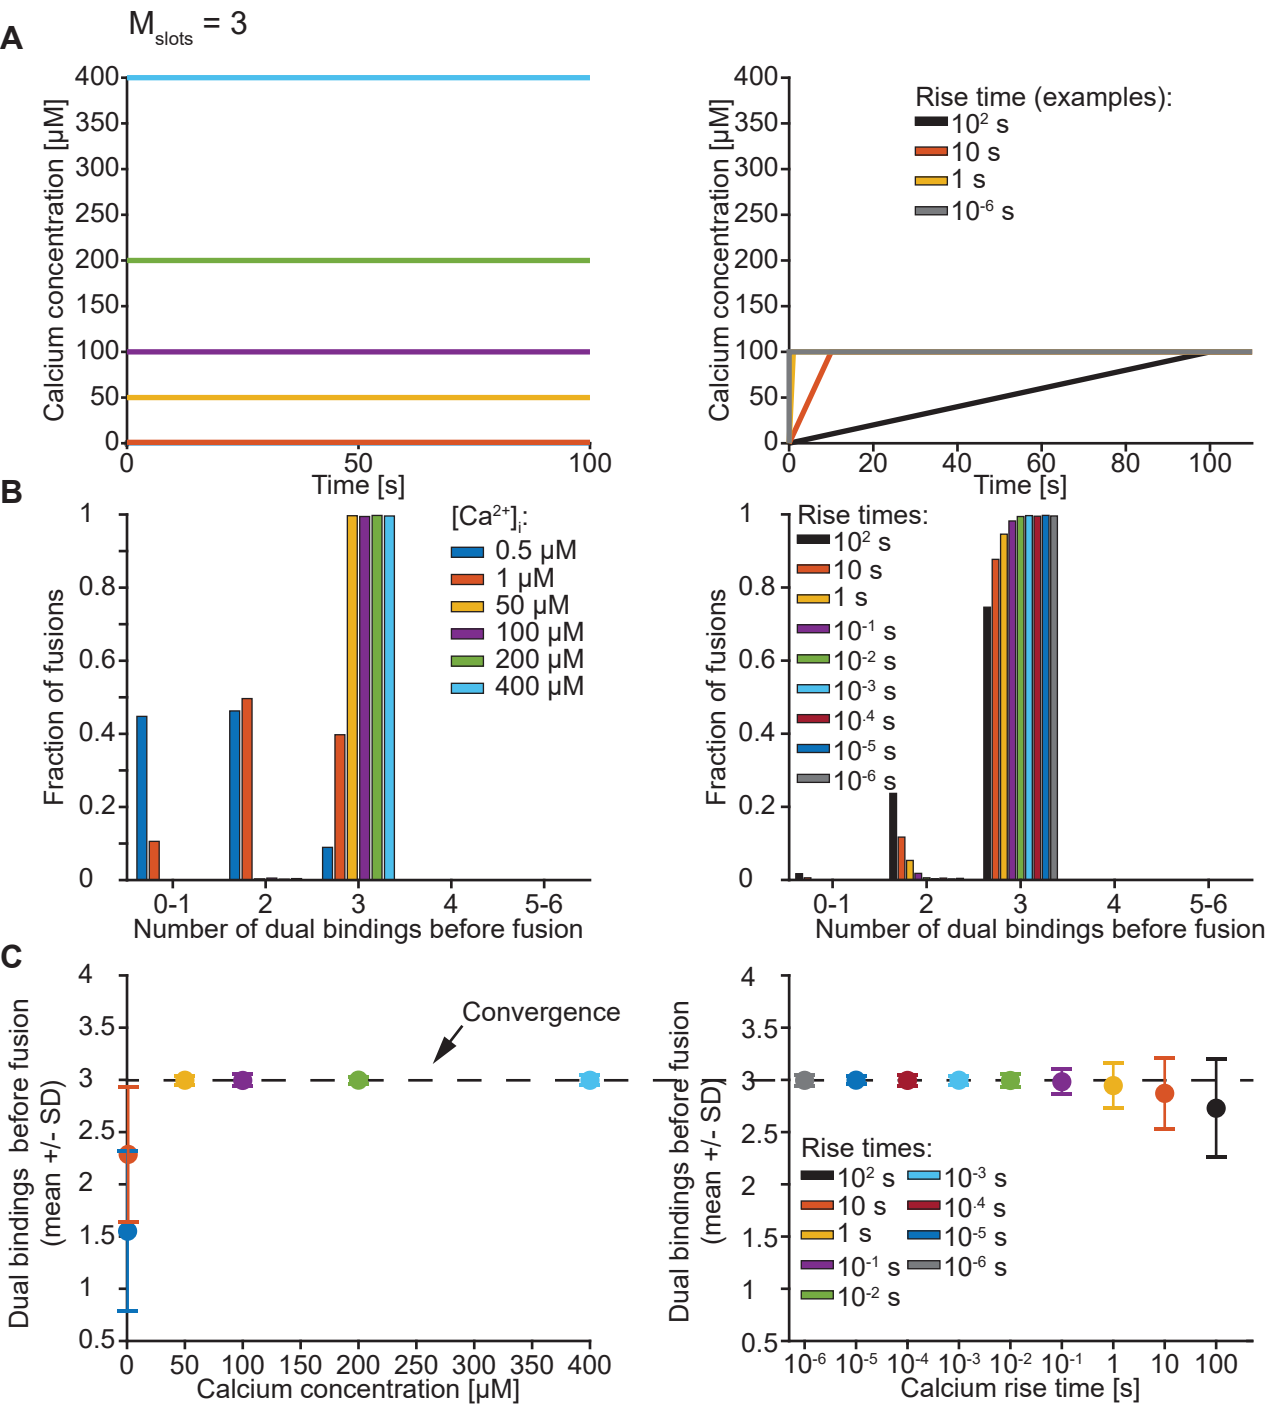

Supplement: supp [file elife_poa_e74810_Figure_2_figure_supplement_2.pdf › elife_poa_e74810_Figure_2_figure_supplement_2.pdf]

Figure 2 - figure supplement 3

**A**  $M_{\text{slots}} = 6$

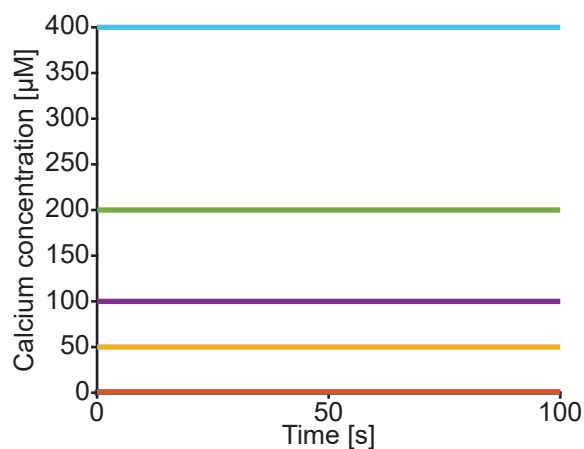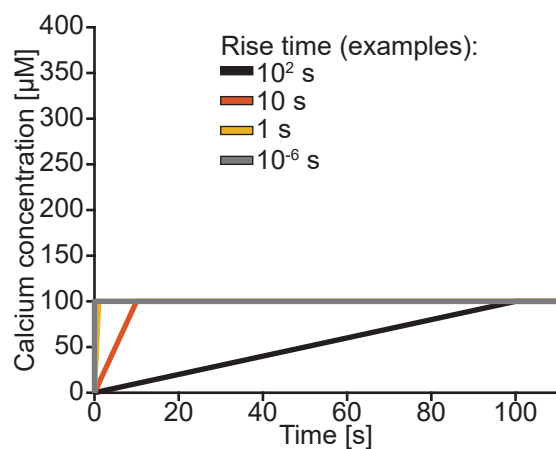

**B**

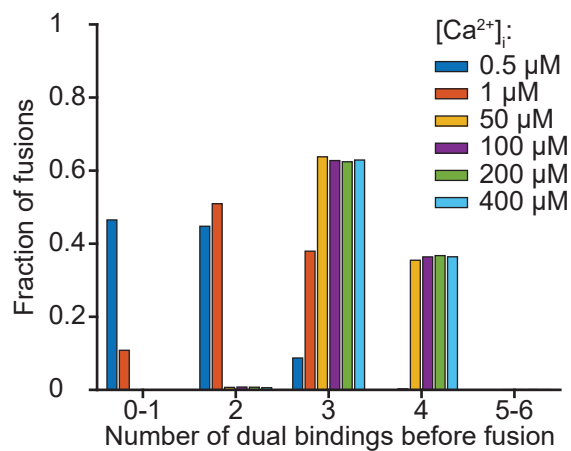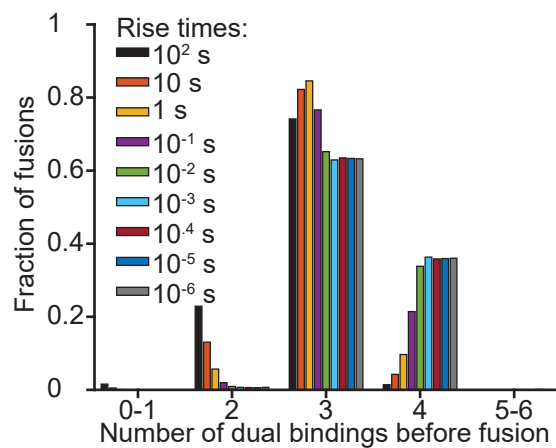

**C**

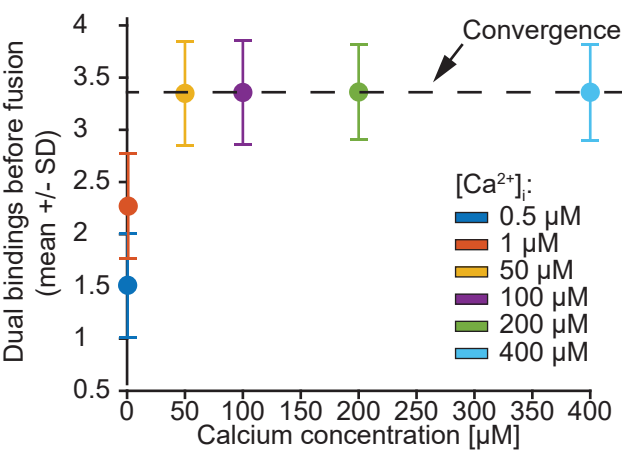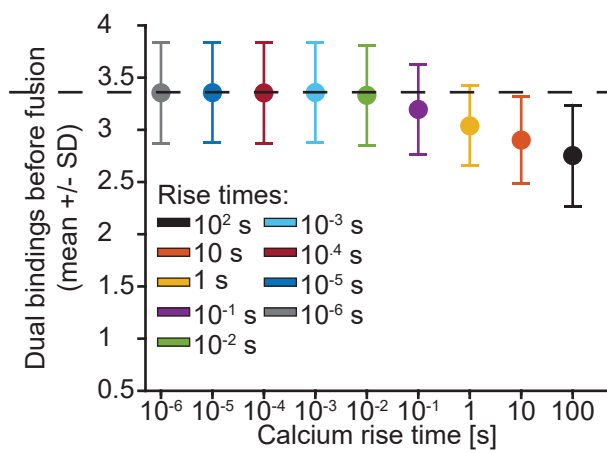

Supplement: supp [file elife_poa_e74810_Figure_2_figure_supplement_3.pdf › elife_poa_e74810_Figure_2_figure_supplement_3.pdf]

Figure 2 - figure supplement 4

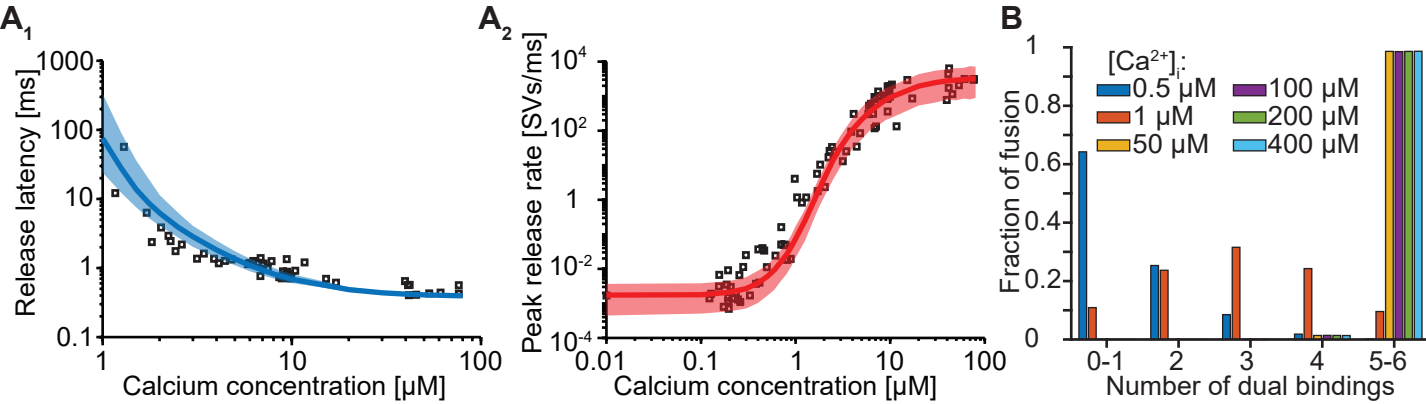

Supplement: supp [file elife_poa_e74810_Figure_2_figure_supplement_4.pdf › elife_poa_e74810_Figure_2_figure_supplement_4.pdf]

Figure 2 - figure supplement 5

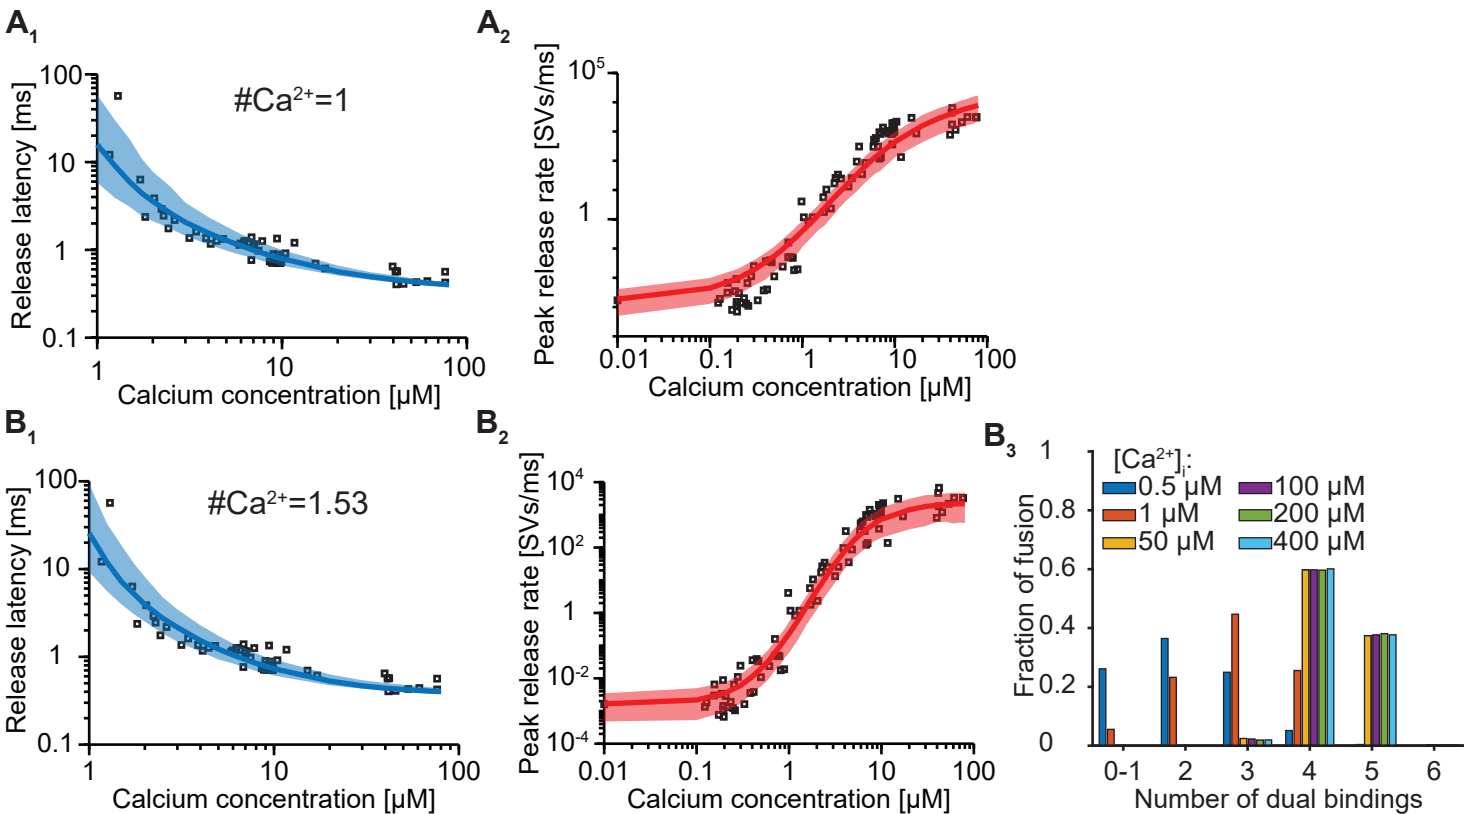

Supplement: supp [file elife_poa_e74810_Figure_2_figure_supplement_5.pdf › elife_poa_e74810_Figure_2_figure_supplement_5.pdf]

Figure 2 - figure supplement 6

A

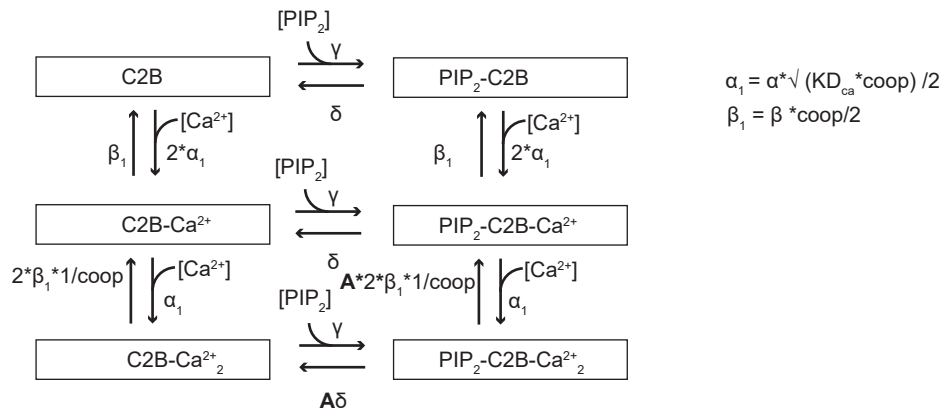

B<sub>1</sub>

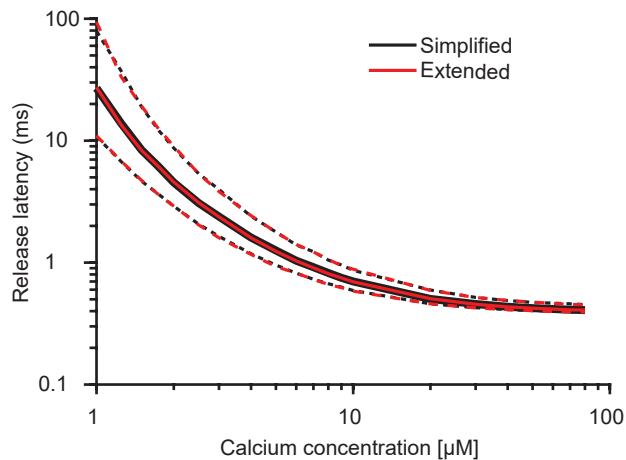

B<sub>2</sub>

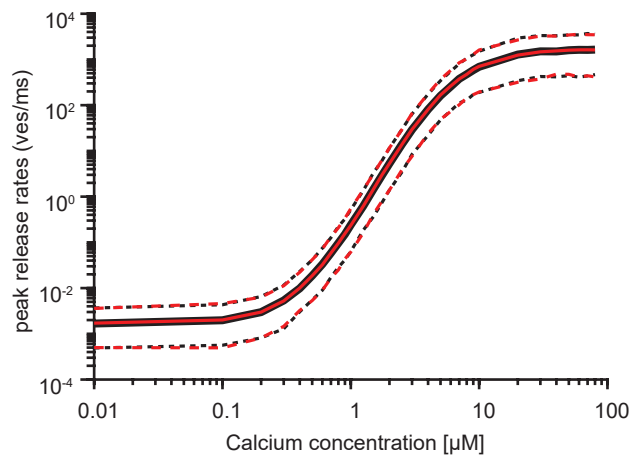

Supplement: supp [file elife_poa_e74810_Figure_2_figure_supplement_6.pdf › elife_poa_e74810_Figure_2_figure_supplement_6.pdf]

Figure 3 - figure supplement 1

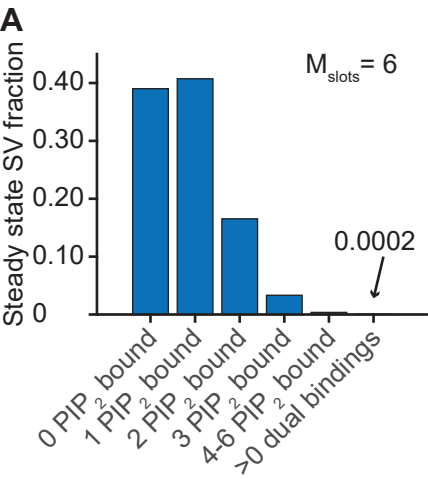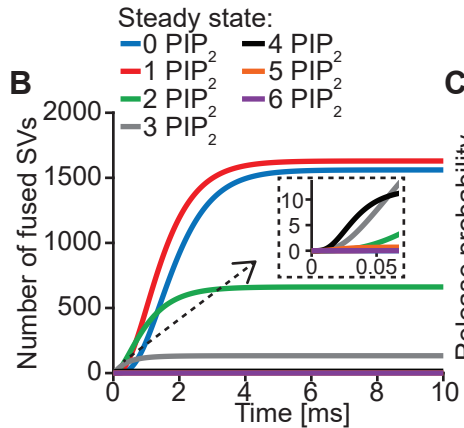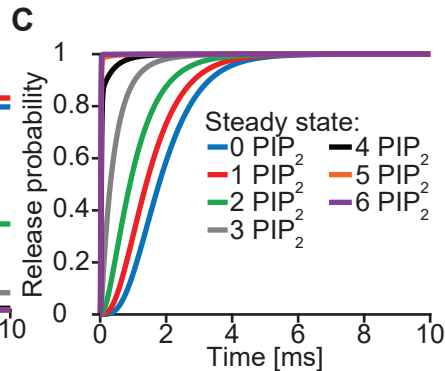

Supplement: supp [file elife_poa_e74810_Figure_3_figure_supplement_1.pdf › elife_poa_e74810_Figure_3_figure_supplement_1.pdf]

Figure 4- figure supplement 1

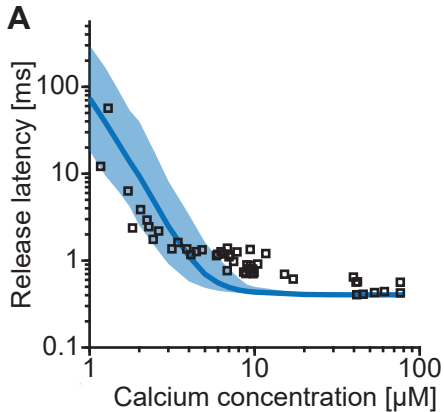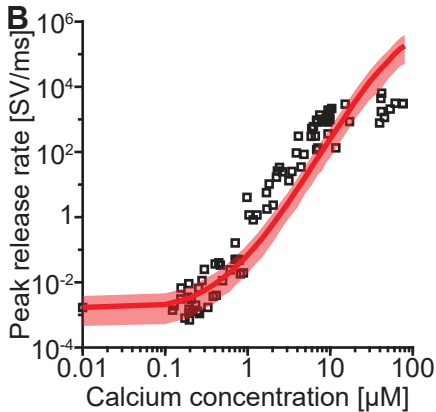

Supplement: supp [file elife_poa_e74810_Figure_4_figure_supplement_1.pdf › elife_poa_e74810_Figure_4_figure_supplement_1.pdf]

Figure 5 - figure supplement 1

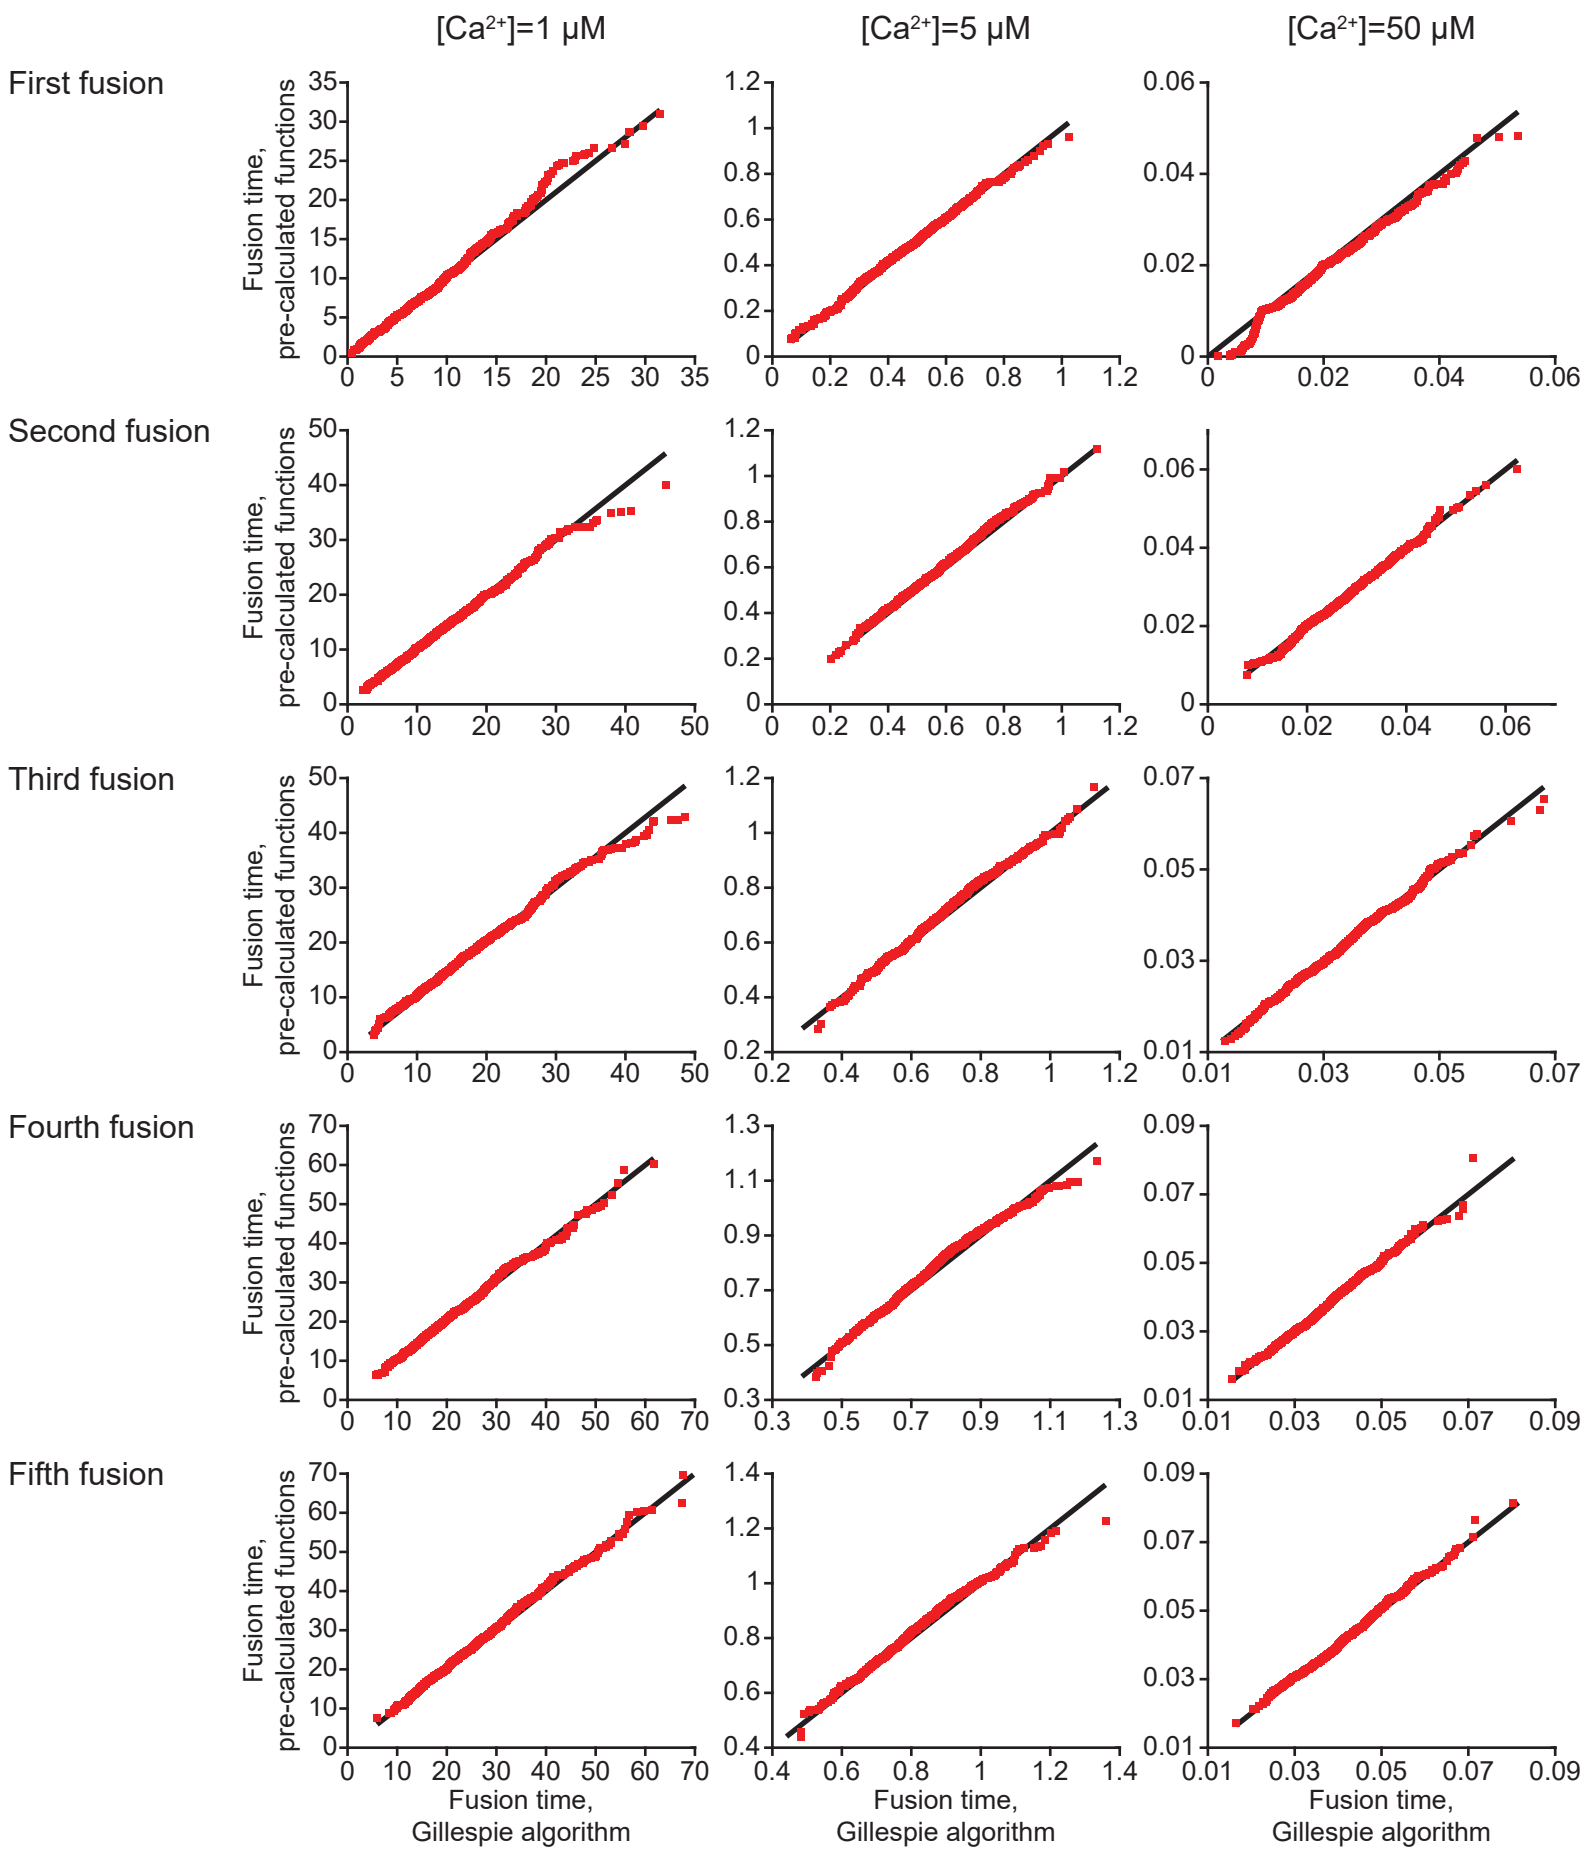

Supplement: supp [file elife_poa_e74810_Figure_5_figure_supplement_1.pdf › elife_poa_e74810_Figure_5_figure_supplement_1.pdf]

Figure 5 - figure supplement 2

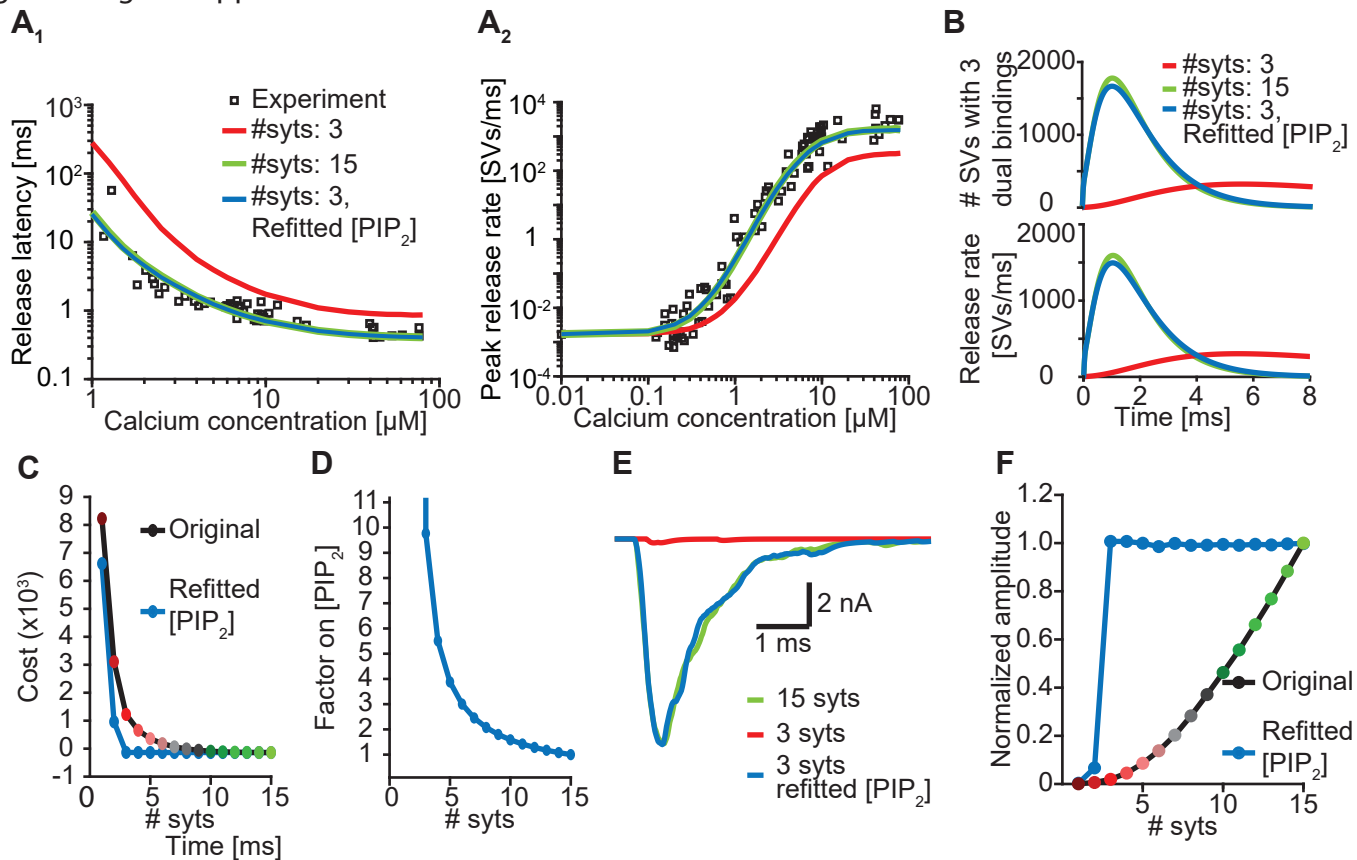

Supplement: supp [file elife_poa_e74810_Figure_5_figure_supplement_2.pdf › elife_poa_e74810_Figure_5_figure_supplement_2.pdf]
